# Supplementary material for: Genome-Wide Association Studies of Seven Root Traits in Soybean (Glycine max L.) Landraces
Source: MDPI journal article supplement (doi:10.3390/ijms24010873), 2023-01-03
Supplement: s1 [file s1]

Table S1. Descriptive statistics for seven root traits in 357soybean landraces.

| Traits | Range                | Mean     | SD <sup>a</sup> | CV (%) <sup>b</sup> | Skewness | Kurtosis |
|--------|----------------------|----------|-----------------|---------------------|----------|----------|
| DIAM.  | 0.404 - 0.666        | 0.537    | 0.046           | 8.686               | 0.111    | -0.391   |
| LAD    | 0.429 - 0.725        | 0.563    | 0.052           | 9.256               | 0.134    | -0.133   |
| LAL    | 0.109 - 0.379        | 0.216    | 0.032           | 15.120              | 1.104    | 2.996    |
| LENGTH | 703.330 - 3212.642   | 1766.263 | 422.533         | 23.922              | 0.281    | -0.075   |
| NF     | 1180.000 - 11941.670 | 5250.514 | 1692.208        | 32.229              | 0.380    | -0.002   |
| NT     | 622.670 - 3255.000   | 1777.584 | 525.085         | 29.539              | 0.368    | -0.431   |
| SA     | 124.148 - 491.667    | 294.381  | 66.226          | 22.497              | 0.184    | -0.127   |

<sup>a</sup> Standard deviation; <sup>b</sup>Coefficient of variation

Table S2. Eigenvalue and proportion of principal components.

| Principal Component | Eigenvalue | Variability (%) | Cumulative (%) |
|---------------------|------------|-----------------|----------------|
| 1                   | 74.38      | 34.00           | 34.20          |
| 2                   | 30.64      | 14.00           | 48.30          |
| 3                   | 21.55      | 10.00           | 58.20          |
| 4                   | 17.71      | 8.00            | 66.40          |
| 5                   | 15.67      | 7.00            | 73.60          |
| 6                   | 15.02      | 7.00            | 80.50          |
| 7                   | 11.52      | 5.00            | 85.80          |
| 8                   | 10.73      | 5.00            | 90.70          |
| 9                   | 10.28      | 5.00            | 95.50          |
| 10                  | 9.72       | 4.00            | 100.00         |

**Table S3.** List of putative candidate genes associated with significant SNPs from MLM model at the vicinity of (100 Kb either side).

| Trait | SNP         | Chr  | Gene Name              | Start    | End      | Strand | Description                                                         |
|-------|-------------|------|------------------------|----------|----------|--------|---------------------------------------------------------------------|
| DIAM  | AX-90460045 | Gm02 | <i>Glyma.02g248800</i> | 43611197 | 43611776 | +      | _                                                                   |
|       |             |      | <i>Glyma.02g249000</i> | 43662205 | 43664226 | -      | Aspartyl proteases                                                  |
|       |             |      | <i>Glyma.02g249100</i> | 43676217 | 43678117 | -      | E3ubiquitin-proteinligasecip8                                       |
|       |             |      | <i>Glyma.02g249200</i> | 43678739 | 43679865 | -      | _                                                                   |
|       |             |      | <i>Glyma.02g249300</i> | 43682559 | 43685068 | -      | Glycerol-3-phosphateacyltransferase5-related                        |
|       |             |      | <i>Glyma.02g249400</i> | 43689781 | 43693616 | -      | Proteindnj-23-related                                               |
|       |             |      | <i>Glyma.02g249500</i> | 43704884 | 43707125 | -      | Thaumatococcus family(thaumatin)                                    |
|       |             |      | <i>Glyma.02g249600</i> | 43713516 | 43717718 | -      | Ribulosebis phosphate carboxylase/oxygenase activase, chloroplastic |
|       |             |      | <i>Glyma.02g249700</i> | 43723333 | 43724257 | +      | Lob domain-containing protein33                                     |
|       |             |      | <i>Glyma.02g249800</i> | 43733046 | 43736212 | -      | At-hook motif nuclear localized protein 15                          |
|       |             |      | <i>Glyma.02g249900</i> | 43743444 | 43744190 | +      | _                                                                   |
|       |             |      | <i>Glyma.02g250000</i> | 43747970 | 43755063 | +      | Guanyl-nucleotide exchange factor                                   |
|       |             |      | <i>Glyma.02g250100</i> | 43762133 | 43762993 | +      | Transcriptional regulator superman                                  |
|       |             |      | <i>Glyma.02g250200</i> | 43779470 | 43781548 | +      | Protein phosphatase2c3-related                                      |
|       |             |      | <i>Glyma.02g250300</i> | 43783184 | 43785004 | -      | _                                                                   |
|       |             |      | <i>Glyma.02g250400</i> | 43786923 | 43791698 | -      | Methyltransferase pmt10-related                                     |
|       |             |      | <i>Glyma.02g250500</i> | 43797931 | 43798131 | -      | _                                                                   |
|       |             |      | <i>Glyma.02g250600</i> | 43803483 | 43807640 | +      | PPR repeat(ppr)/ ppr repeat family (ppr_2)                          |
|       | AX-90505093 | Gm03 | <i>Glyma.03g249500</i> | 44562673 | 44568783 | -      | Proteingyg-1, isoform                                               |
|       | AX-90311611 |      | <i>Glyma.03g248600</i> | 44489655 | 44498277 | -      | Aldo/keto reductase                                                 |

|  |                                                                         |      |                        |          |          |   |                                                                                 |
|--|-------------------------------------------------------------------------|------|------------------------|----------|----------|---|---------------------------------------------------------------------------------|
|  | AX-90308307<br>AX-90385325<br>AX-90442177<br>AX-90503377<br>AX-90345460 |      | <i>Glyma.03g248700</i> | 44499588 | 44502884 | - | Aldo/keto reductase                                                             |
|  |                                                                         |      | <i>Glyma.03g248800</i> | 44506460 | 44512186 | + | Zein-binding(zein-binding)                                                      |
|  |                                                                         |      | <i>Glyma.03g248900</i> | 44513489 | 44514230 | + | _                                                                               |
|  |                                                                         |      | <i>Glyma.03g249000</i> | 44521820 | 44526089 | + | Grf1-interactingfactor1                                                         |
|  |                                                                         |      | <i>Glyma.03g249100</i> | 44529232 | 44529956 | - | Vq motif (vq)                                                                   |
|  |                                                                         |      | <i>Glyma.03g249200</i> | 44540832 | 44551676 | + | Myosin-11-related                                                               |
|  |                                                                         |      | <i>Glyma.03g249300</i> | 44553517 | 44555047 | - | F-box associated ubiquitination effector family protein                         |
|  |                                                                         |      | <i>Glyma.03g249400</i> | 44557289 | 44557836 | - | _                                                                               |
|  |                                                                         |      | <i>Glyma.03g249600</i> | 44569709 | 44572013 | - | Profilin(profilin)                                                              |
|  |                                                                         |      | <i>Glyma.03g249700</i> | 44581032 | 44582153 | - | C2domain(c2)                                                                    |
|  |                                                                         |      | <i>Glyma.03g249800</i> | 44588637 | 44595274 | + | Setdomain protein                                                               |
|  |                                                                         |      | <i>Glyma.03g249900</i> | 44595527 | 44597546 | - | Caleosin-related family protein-related                                         |
|  |                                                                         |      | <i>Glyma.03g250000</i> | 44599051 | 44603637 | + | Myb family transcription factor-related                                         |
|  |                                                                         |      | <i>Glyma.03g250100</i> | 44604344 | 44608040 | + | Peroxisome assembly protein12                                                   |
|  |                                                                         |      | <i>Glyma.03g250200</i> | 44607834 | 44610091 | - | _                                                                               |
|  |                                                                         |      | <i>Glyma.03g250300</i> | 44611777 | 44616698 | + | Alpha-1,6-fucosyltransferase                                                    |
|  |                                                                         |      | <i>Glyma.03g250400</i> | 44616824 | 44621636 | - | Ankyrin repeat-containing protein                                               |
|  |                                                                         |      | <i>Glyma.03g250500</i> | 44625641 | 44630894 | + | Swib/mdm2,plus-3andgyfdomain-containingprotein-related                          |
|  |                                                                         |      | <i>Glyma.03g250600</i> | 44634084 | 44635415 | + | Myb-like DNA-binding protein                                                    |
|  |                                                                         |      | <i>Glyma.03g250700</i> | 44637659 | 44643389 | + | Chloroplastj-likedomain1-containingprotein                                      |
|  |                                                                         |      | <i>Glyma.03g250900</i> | 44660923 | 44662144 | + | Protein of unknown function (duf640)                                            |
|  |                                                                         |      | <i>Glyma.03g251000</i> | 44667735 | 44668730 | + | _                                                                               |
|  | AX-90385554                                                             | Gm03 | <i>Glyma.03g253500</i> | 44903910 | 44910278 | - | Violaxanthin de-epoxidase, chloroplastic                                        |
|  |                                                                         |      | <i>Glyma.03g253600</i> | 44909846 | 44913008 | + | Non-specific serine/ threonine protein kinase/threonine-specific protein kinase |
|  |                                                                         |      | <i>Glyma.03g253700</i> | 44915061 | 44916435 | + | Domain of unknown function (DUF4228)                                            |

|  |                                                                                                       |      |                        |          |          |   |                                                                                                                                                                  |
|--|-------------------------------------------------------------------------------------------------------|------|------------------------|----------|----------|---|------------------------------------------------------------------------------------------------------------------------------------------------------------------|
|  | AX-90513850<br>AX-90502675<br>AX-90329829<br>AX-90504776<br>AX-90434642<br>AX-90416589<br>AX-90426968 | Gm06 | <i>Glyma.06g126000</i> | 10293511 | 10313877 | + | RNA recognition motif (rrm_1)/<br>peptidasefamilym41(peptidase_m41)/<br>relatedsubfamily)(aaa_5)//rnarecogniti<br>onmotif.(a.k.a.rrm,rbd,ornnpdomain)(r<br>rm_5) |
|  |                                                                                                       |      | <i>Glyma.06g126100</i> | 10315437 | 10317265 | - | Abscisic acid receptor PY110-related                                                                                                                             |
|  |                                                                                                       |      | <i>Glyma.06g126200</i> | 10329274 | 10330451 | + | _                                                                                                                                                                |
|  |                                                                                                       |      | <i>Glyma.06g126300</i> | 10331312 | 10341252 | - | Trehalose-6-phosphate synthase                                                                                                                                   |
|  |                                                                                                       |      | <i>Glyma.06g126400</i> | 10356650 | 10362151 | - | _                                                                                                                                                                |
|  |                                                                                                       |      | <i>Glyma.06g126500</i> | 10367536 | 10373426 | - | Proteindhs-1                                                                                                                                                     |
|  |                                                                                                       |      | <i>Glyma.06g126600</i> | 10376446 | 10384391 | + | Cyclicnucleotide-gatedionchannel1                                                                                                                                |
|  |                                                                                                       |      | <i>Glyma.06g126700</i> | 10384771 | 10389578 | - | Spermine synthase/spermidine amino<br>propyl transferase                                                                                                         |
|  |                                                                                                       |      | <i>Glyma.06g126800</i> | 10400498 | 10401860 | - | F-box domain(f-box)                                                                                                                                              |
|  |                                                                                                       |      | <i>Glyma.06g126900</i> | 10403126 | 10408307 | - | 3-oxoacyl-[acyl-carrier-protein]<br>synthase-like protein                                                                                                        |
|  |                                                                                                       |      | <i>Glyma.06g127000</i> | 10409463 | 10415886 | + | _                                                                                                                                                                |
|  |                                                                                                       |      | <i>Glyma.06g127100</i> | 10419701 | 10425340 | + | Protein of unknown function (duf668)                                                                                                                             |
|  |                                                                                                       |      | <i>Glyma.06g127200</i> | 10423873 | 10430156 | - | Phosphomevalonatekinase                                                                                                                                          |
|  |                                                                                                       |      | <i>Glyma.06g127300</i> | 10432974 | 10434886 | - | Ringfingerdomain (zf-ring_2)/wall-<br>associatedreceptorkinasegalacturonan-<br>binding(gub_wak_bind)//wall-<br>associatedreceptorkinasec-<br>terminal(wak_assoc) |
|  |                                                                                                       |      | <i>Glyma.06g127400</i> | 10435277 | 10448595 | - | _                                                                                                                                                                |
|  |                                                                                                       |      | <i>Glyma.06g127500</i> | 10462640 | 10469529 | + | Splicing factor3 a subunit 3                                                                                                                                     |
|  |                                                                                                       |      | <i>Glyma.06g127600</i> | 10474884 | 10482574 | - | _                                                                                                                                                                |
|  |                                                                                                       |      | <i>Glyma.06g127700</i> | 10486250 | 10492229 | + | Plastid-lipid-associated protein14,<br>chloroplastic-related                                                                                                     |
|  | AX-90524509<br>AX-90332250                                                                            | Gm14 | <i>Glyma.14g197300</i> | 46239260 | 46240644 | + | Proteinlight-<br>dependentshorthypocotyls5                                                                                                                       |
|  |                                                                                                       |      | <i>Glyma.14g197400</i> | 46269392 | 46271494 | - | Apoprotein3, mitochondrial                                                                                                                                       |
|  |                                                                                                       |      | <i>Glyma.14g197500</i> | 46280214 | 46282933 | + | Ferroxidase/hephaestin                                                                                                                                           |

|  |                                           |      |                        |          |          |   |                                                   |
|--|-------------------------------------------|------|------------------------|----------|----------|---|---------------------------------------------------|
|  |                                           |      | <i>Glyma.14g197600</i> | 46288254 | 46290941 | + | Cinnamoyl-coareductase-likeprotein                |
|  |                                           |      | <i>Glyma.14g197700</i> | 46291986 | 46298337 | + | Transcriptioninitiationfactortfiidsubun<br>it15b  |
|  |                                           |      | <i>Glyma.14g197800</i> | 46303686 | 46308920 | + | _                                                 |
|  |                                           |      | <i>Glyma.14g197900</i> | 46327072 | 46328700 | + | Cct motif (cct)                                   |
|  |                                           |      | <i>Glyma.14g198000</i> | 46334117 | 46336863 | + | Udp-glycosyl transferase 87a2                     |
|  |                                           |      | <i>Glyma.14g198100</i> | 46337677 | 46340654 | + | Glucosyl/glucuronosyl transferases                |
|  |                                           |      | <i>Glyma.14g198200</i> | 46342657 | 46344315 | - | Exocyst complex protein exo70                     |
|  |                                           |      | <i>Glyma.14g198300</i> | 46345968 | 46346877 | + | Glucosyl/glucuronosyl transferases                |
|  |                                           |      | <i>Glyma.14g198400</i> | 46347605 | 46349378 | - | Exocyst complex protein exo70                     |
|  |                                           |      | <i>Glyma.14g198500</i> | 46352163 | 46354775 | - | Exocystcomplexproteinexo70                        |
|  |                                           |      | <i>Glyma.14g198600</i> | 46360801 | 46362778 | + | Udp-glycosyltransferase87a1                       |
|  |                                           |      | <i>Glyma.14g198700</i> | 46367820 | 46374604 | + | Serine/threonine protein phosphatase              |
|  |                                           |      | <i>Glyma.14g198800</i> | 46375963 | 46379746 | - | Mitochondrial carrier protein mrs3/4              |
|  |                                           |      | <i>Glyma.14g198900</i> | 46404283 | 46407292 | - | Laccase-13-related                                |
|  |                                           |      | <i>Glyma.14g199000</i> | 46413031 | 46419952 | + | Sortingnexin                                      |
|  |                                           |      | <i>Glyma.14g199100</i> | 46421954 | 46422457 | + | Exocystcomplexproteinexo70                        |
|  |                                           |      | <i>Glyma.14g199200</i> | 46425482 | 46428141 | + | _                                                 |
|  |                                           |      | <i>Glyma.14g199300</i> | 46433103 | 46433444 | + | _                                                 |
|  |                                           |      | <i>Glyma.14g199400</i> | 46435759 | 46438392 | - | Diseaseresistanceproteinrpp13-related             |
|  | AX-90367887<br>AX-90402282<br>AX-90468047 | Gm18 | <i>Glyma.18g300200</i> | 57789188 | 57820853 | + | Callosesynthase3                                  |
|  |                                           |      | <i>Glyma.18g300300</i> | 57823394 | 57831151 | + | Wdsam1protein                                     |
|  |                                           |      | <i>Glyma.18g300400</i> | 57831381 | 57834152 | - | Oligo peptide transporter-related                 |
|  |                                           |      | <i>Glyma.18g300500</i> | 57841316 | 57843280 | + | Pirin                                             |
|  |                                           |      | <i>Glyma.18g300600</i> | 57844897 | 57846271 | - | Gtpaserab11/ypt3, small g protein<br>super family |
|  |                                           |      | <i>Glyma.18g300700</i> | 57852461 | 57859687 | + | Signalpeptidepeptidase-like3-related              |
|  |                                           |      | <i>Glyma.18g300800</i> | 57860162 | 57861657 | + | _                                                 |
|  |                                           |      | <i>Glyma.18g300900</i> | 57867768 | 57869200 | - | Auxin responsive protein<br>(auxin_inducible)     |
|  |                                           |      | <i>Glyma.18g301000</i> | 57890959 | 57891781 | + | Non-specific serine/threonine protein<br>kinase   |

|            |             |      |                        |          |          |   |                                                                                          |
|------------|-------------|------|------------------------|----------|----------|---|------------------------------------------------------------------------------------------|
|            |             |      | <i>Glyma.18g301100</i> | 57894037 | 57895910 | - | Bi directional sugar transporter sweet15                                                 |
|            |             |      | <i>Glyma.18g301200</i> | 57903571 | 57906434 | - | Bi directional sugar transporter sweet15                                                 |
|            |             |      | <i>Glyma.18g301300</i> | 57913464 | 57915469 | - | _                                                                                        |
|            |             |      | <i>Glyma.18g301400</i> | 57915964 | 57916724 | - | _                                                                                        |
|            |             |      | <i>Glyma.18g301500</i> | 57926526 | 57928866 | + | No apical meristem (nam)protein                                                          |
|            |             |      | <i>Glyma.18g301600</i> | 57939468 | 57945328 | + | BAR domain                                                                               |
|            |             |      | <i>Glyma.18g301700</i> | 57945537 | 57947130 | - | Brassino steroid insensitive1-associated receptor kinase1-related                        |
|            |             |      | <i>Glyma.18g301800</i> | 57950394 | 57950985 | + | _                                                                                        |
|            |             |      | <i>Glyma.18g301900</i> | 57953323 | 57956369 | - | Lipopolysaccharide-induced transcription factor regulating tumor necrosis factoralpha    |
|            |             |      | <i>Glyma.18g302000</i> | 57965322 | 57969597 | + | Bomb/kira proteins                                                                       |
|            |             |      | <i>Glyma.18g302100</i> | 57988925 | 57992117 | + | Cdp-diacylglycerol--glycerol-3-phosphate3-                                               |
|            |             |      | <i>Glyma.18g302200</i> | 57998307 | 58011231 | + | Histone-lysine-methyl transferase ASHR3                                                  |
|            |             |      | <i>Glyma.18g302300</i> | 58014611 | 58017908 | + | 65-k d microtubule-associated protein 6-related                                          |
|            |             |      | <i>Glyma.03g251100</i> | 44673965 | 44702804 | - | Exportin-4                                                                               |
| <b>LAD</b> | AX-90345460 | Gm03 | <i>Glyma.03g251200</i> | 44703737 | 44706084 | - | PPR repeat family (ppr_2)                                                                |
|            |             |      | <i>Glyma.03g251300</i> | 44708643 | 44717310 | + | Phosphatase 2a regulatory subunit-related                                                |
|            |             |      | <i>Glyma.03g251400</i> | 44718734 | 44719931 | + | Non-specific serine/ threonine protein kinase/ phosphoenol pyruvate carboxy kinase (atp) |
|            |             |      | <i>Glyma.03g251500</i> | 44723994 | 44729654 | - | Serine/threonine-protein phosphatase PP1 isozyme 2-related                               |
|            |             |      | <i>Glyma.03g251600</i> | 44735415 | 44736486 | - | Peptidyl-prolylcis-trans isomerase cyp18-3-related                                       |
|            |             |      | <i>Glyma.03g251700</i> | 44736493 | 44741875 | - | Ethylene response sensor 2-related                                                       |

|  |             |      |                        |          |          |   |                                                              |
|--|-------------|------|------------------------|----------|----------|---|--------------------------------------------------------------|
|  |             |      | <i>Glyma.03g251800</i> | 44744746 | 44751071 | - | At hook motif DNA-binding family protein-related             |
|  |             |      | <i>Glyma.03g251900</i> | 44752444 | 44755159 | - | Associate of c-mycamy-1                                      |
|  |             |      | <i>Glyma.03g252000</i> | 44756482 | 44767598 | - | Suppressor of actin mutations 2/ vacuolar protein sorting 52 |
|  |             |      | <i>Glyma.03g252100</i> | 44768483 | 44772056 | + | Single-stranded DNA-binding protein why2, mitochondrial      |
|  |             |      | <i>Glyma.03g252200</i> | 44773982 | 44778842 | - | Duf 239, (dof4409)                                           |
|  |             |      | <i>Glyma.03g252300</i> | 44781815 | 44809556 | - | Translational activator gcn1                                 |
|  |             |      | <i>Glyma.03g252400</i> | 44813173 | 44813557 | + | —                                                            |
|  |             |      | <i>Glyma.03g252500</i> | 44819920 | 44825163 | + | Gdslesterase/lipaselt1                                       |
|  |             |      | <i>Glyma.03g252600</i> | 44830497 | 44833487 | + | Zincfingerfyvedomaincontainingprotei n                       |
|  |             |      | <i>Glyma.03g252700</i> | 44841960 | 44844706 | + | Gdslesterase/lipaselt1                                       |
|  |             |      | <i>Glyma.03g252800</i> | 44849419 | 44851672 | + | Zinc finger fyve domain containin gprotein                   |
|  |             |      | <i>Glyma.03g252900</i> | 44853430 | 44853922 | + | Histidine kinase/proteinkinase(histidine)                    |
|  |             |      | <i>Glyma.03g253000</i> | 44856721 | 44878696 | + | P53 inducible protein pir121                                 |
|  |             |      | <i>Glyma.03g253100</i> | 44880486 | 44882438 | + | Beta catenin-related armadillo repeat-containing             |
|  |             |      | <i>Glyma.03g253200</i> | 44887335 | 44889341 | - | Late embryogenesis abundant3 (lea3) family protein           |
|  |             |      | <i>Glyma.03g253300</i> | 44888518 | 44892973 | + | U1small nuclear ribonucleo protein                           |
|  |             |      | <i>Glyma.03g253400</i> | 44899608 | 44901536 | - | —                                                            |
|  | AX-90426968 | Gm06 | <i>Glyma.06g127800</i> | 10493847 | 10506001 | - | Histone-lysine-methyl transferase atx4-related               |
|  |             |      | <i>Glyma.06g127900</i> | 10510306 | 10515402 | - | Cct motif family protein                                     |
|  |             |      | <i>Glyma.06g128000</i> | 10534942 | 10537640 | - | Nuclear migration protein                                    |
|  |             |      | <i>Glyma.06g128100</i> | 10538914 | 10540591 | + | Oxido reductase, 2og-feii oxygenase family protein           |
|  |             |      | <i>Glyma.06g128200</i> | 10543911 | 10545747 | + | Flavonolsynthase                                             |
|  |             |      | <i>Glyma.06g128300</i> | 10546528 | 10547630 | + | —                                                            |



|  |             |      |                        |          |          |   |                                                               |
|--|-------------|------|------------------------|----------|----------|---|---------------------------------------------------------------|
|  |             |      | <i>Glyma.06g128400</i> | 10546758 | 10548460 | + | Alpha/beta-hydrolases superfamily protein                     |
|  |             |      | <i>Glyma.06g128500</i> | 10564808 | 10569476 | + | Pectin esterase/ pectin esterase inhibitor 34-related         |
|  |             |      | <i>Glyma.06g128600</i> | 10572823 | 10578723 | - | Dipeptidyl-peptidaseiv/ xaa-pro-dipeptidyl amino peptidase    |
|  |             |      | <i>Glyma.06g128700</i> | 10581580 | 10588773 | - | Calcineurinb-likeprotein4                                     |
|  |             |      | <i>Glyma.06g128800</i> | 10598708 | 10598973 | - | _                                                             |
|  |             |      | <i>Glyma.06g128900</i> | 10600212 | 10602821 | + | Pprrepeat (ppr)/ pprrepeat (ppr_1)/ ppr repeat family (ppr_2) |
|  | AX-90481233 | Gm12 | <i>Glyma.12g192800</i> | 35434955 | 35439253 | - | Multi-copperoxidase                                           |
|  |             |      | <i>Glyma.12g192900</i> | 35440475 | 35444708 | - | _                                                             |
|  |             |      | <i>Glyma.12g193000</i> | 35450459 | 35456613 | - | Arogenatedehydratase/carboxy cyclo hexadienyl dehydratase     |
|  |             |      | <i>Glyma.12g193100</i> | 35463673 | 35472010 | + | _                                                             |
|  |             |      | <i>Glyma.12g193200</i> | 35473199 | 35474392 | + | _                                                             |
|  |             |      | <i>Glyma.12g193300</i> | 35478288 | 35482335 | + | Myb-like DNA-binding protein                                  |
|  |             |      | <i>Glyma.12g193400</i> | 35488883 | 35491610 | - | _                                                             |
|  |             |      | <i>Glyma.12g193500</i> | 35498865 | 35503832 | - | Alcohol dehydrogenase related                                 |
|  |             |      | <i>Glyma.12g193600</i> | 35512904 | 35517589 | - | Beta-1,3-galactosyl transferase 2-related                     |
|  |             |      | <i>Glyma.12g193700</i> | 35543782 | 35544619 | - | _                                                             |
|  |             |      | <i>Glyma.12g193800</i> | 35551596 | 35559129 | + | Aconitatehydratase/citrate (isocitrate) hydro-lyase           |
|  |             |      | <i>Glyma.12g193900</i> | 35561363 | 35561746 | - | _                                                             |
|  |             |      | <i>Glyma.12g194000</i> | 35567230 | 35571578 | + | Multidrug resistance protein                                  |
|  |             |      | <i>Glyma.12g194100</i> | 35577962 | 35583881 | + | Glutamate receptor3.6-related                                 |
|  |             |      | <i>Glyma.12g194200</i> | 35592309 | 35598542 | + | Glutamate receptor3.4-related                                 |
|  |             |      | <i>Glyma.12g194300</i> | 35602347 | 35603796 | - | _                                                             |
|  |             |      | <i>Glyma.12g194400</i> | 35606060 | 35613310 | - | Homeo box domain (homeobox)/start domain                      |
|  |             | Gm13 | <i>Glyma.13g162500</i> | 27785225 | 27788045 | - | _                                                             |
|  |             |      | <i>Glyma.13g162000</i> | 27766440 | 27766796 | + | _                                                             |

|  |                                           |  |                        |          |          |   |                                                                                                                           |
|--|-------------------------------------------|--|------------------------|----------|----------|---|---------------------------------------------------------------------------------------------------------------------------|
|  | AX-90405818<br>AX-90405799<br>AX-90496747 |  | <i>Glyma.13g162100</i> | 27767517 | 27768046 | - | _                                                                                                                         |
|  |                                           |  | <i>Glyma.13g162200</i> | 27768047 | 27772562 | - | Translocase of chloroplast 90                                                                                             |
|  |                                           |  | <i>Glyma.13g162300</i> | 27773991 | 27778719 | - | _                                                                                                                         |
|  |                                           |  | <i>Glyma.13g162400</i> | 27781636 | 27783846 | - | Sarscorona virus main proteinase/severe acute respiratory syndrome coronavirus mainprotease                               |
|  |                                           |  | <i>Glyma.13g162600</i> | 27790437 | 27793621 | - | Monogalactosyldiacyl glycerolsynthase/uridinediphosphogalactose-1,2-diacylglycerol galactosyl transferase                 |
|  |                                           |  | <i>Glyma.13g162700</i> | 27796825 | 27800728 | - | _                                                                                                                         |
|  |                                           |  | <i>Glyma.13g162800</i> | 27817824 | 27822630 | + | Inorganic diphosphatase/pyrophosphate phosphohydrolase                                                                    |
|  |                                           |  | <i>Glyma.13g162900</i> | 27823310 | 27833374 | + | Anion transporter6, chloroplastic-related                                                                                 |
|  |                                           |  | <i>Glyma.13g163000</i> | 27833892 | 27837459 | - | Heparanase-likeprotein3                                                                                                   |
|  |                                           |  | <i>Glyma.13g163100</i> | 27847463 | 27849868 | - | _                                                                                                                         |
|  |                                           |  | <i>Glyma.13g163200</i> | 27850927 | 27852651 | + | Adenosine triphosphatase/triphosphatase                                                                                   |
|  |                                           |  | <i>Glyma.13g163300</i> | 27854463 | 27856435 | - | _                                                                                                                         |
|  |                                           |  | <i>Glyma.13g163400</i> | 27861309 | 27869162 | + | Ankyrin repeat and dhhc-type zn-finger domain containing proteins                                                         |
|  |                                           |  | <i>Glyma.13g163500</i> | 27876748 | 27886905 | + | Protein phosphatase1, regulatory subunit, and related proteins/ leucine rich repeat proteins, some proteins contain f-box |
|  |                                           |  | <i>Glyma.13g163600</i> | 27887744 | 27892434 | - | Tpr repeat containing protein                                                                                             |
|  |                                           |  | <i>Glyma.13g163700</i> | 27895777 | 27898359 | - | UPF0051 protein abci8, chloroplastic-related                                                                              |
|  |                                           |  | <i>Glyma.13g163800</i> | 27896301 | 27896661 | + | _                                                                                                                         |
|  |                                           |  | <i>Glyma.13g163900</i> | 27905208 | 27908859 | - | EFH and domain family a1,a2-related                                                                                       |
|  |                                           |  | <i>Glyma.13g164000</i> | 27911603 | 27912972 | + | _                                                                                                                         |

|  |             |      |                        |          |          |   |                                                              |
|--|-------------|------|------------------------|----------|----------|---|--------------------------------------------------------------|
|  |             |      | <i>Glyma.13g164100</i> | 27913120 | 27916690 | - | Major facilitator super family protein                       |
|  |             |      | <i>Glyma.13g164200</i> | 27922878 | 27924801 | - | Bi functional arginine demethylase and lysyl-hydroxylasejmd6 |
|  |             |      | <i>Glyma.13g164300</i> | 27934139 | 27936052 | - | _                                                            |
|  |             |      | <i>Glyma.13g164400</i> | 27940695 | 27943408 | + | _                                                            |
|  |             |      | <i>Glyma.13g164500</i> | 27944852 | 27945076 | + | _                                                            |
|  |             |      | <i>Glyma.13g164600</i> | 27952816 | 27953422 | - | _                                                            |
|  |             |      | <i>Glyma.13g164700</i> | 27958127 | 27961278 | - | _                                                            |
|  | AX-90521967 | Gm13 | <i>Glyma.13g164800</i> | 27967025 | 27969167 | - | Platz transcription factor family protein                    |
|  |             |      | <i>Glyma.13g164900</i> | 27975423 | 27977287 | + | Domain of unknown function (duf1817)                         |
|  |             |      | <i>Glyma.13g165000</i> | 27987286 | 27988809 | + | _                                                            |
|  |             |      | <i>Glyma.13g165100</i> | 27991996 | 27994467 | + | Glutamate receptor3.4-related                                |
|  |             |      | <i>Glyma.13g165200</i> | 27997373 | 27999343 | + | 40sribosomal proteins 11 family member                       |
|  | AX-90336511 | Gm13 | <i>Glyma.13g165300</i> | 28011615 | 28015224 | + | Protein phosphatase2c                                        |
|  |             |      | <i>Glyma.13g165400</i> | 28016508 | 28021594 | - | 116kdau 5 small nuclear ribonucleo protein component         |
|  |             |      | <i>Glyma.13g165500</i> | 28030788 | 28034710 | + | Ring finger domain-containing                                |
|  |             |      | <i>Glyma.13g165600</i> | 28035507 | 28038063 | - | _                                                            |
|  |             |      | <i>Glyma.16g173700</i> | 33430875 | 33438490 | + | Aaaatpase                                                    |
|  | AX-90502945 | Gm16 | <i>Glyma.16g173800</i> | 33431688 | 33431888 | - | _                                                            |
|  |             |      | <i>Glyma.16g173900</i> | 33439127 | 33447439 | - | Leucine richr epeat (lrr_1)/ (lrrnt_2)/ (lrr_8)              |
|  |             |      | <i>Glyma.16g174000</i> | 33452980 | 33456674 | - | lrr_1/llr_8                                                  |
|  |             |      | <i>Glyma.16g174100</i> | 33475023 | 33478604 | - | lrrnt_2/ lrr_8                                               |
|  |             |      | <i>Glyma.16g174200</i> | 33491255 | 33494665 | + | Micro tubule-severing ATPase/ katanin                        |
|  |             |      | <i>Glyma.16g174300</i> | 33493635 | 33496282 | - | Histone deacetylase/hdac                                     |
|  |             |      | <i>Glyma.16g174400</i> | 33529239 | 33531183 | + | lrr_1                                                        |
|  |             |      | <i>Glyma.16g174500</i> | 33532929 | 33535530 | + | lrr_1/llr_8                                                  |
|  |             |      | <i>Glyma.16g174600</i> | 33541866 | 33550018 | + | lrr_1/ llr_2/llr_8                                           |

|     |             |      |                        |          |          |   |                                                                                                                |
|-----|-------------|------|------------------------|----------|----------|---|----------------------------------------------------------------------------------------------------------------|
|     |             |      | <i>Glyma.16g174700</i> | 33568260 | 33573288 | + | lrr_1/ llr_2/llr_8                                                                                             |
|     |             |      | <i>Glyma.16g174800</i> | 33588132 | 33591504 | + | lrr_1/llr_8                                                                                                    |
|     |             |      | <i>Glyma.16g174900</i> | 33595320 | 33596393 | - | Aaaatpase                                                                                                      |
|     |             |      | <i>Glyma.16g175000</i> | 33606851 | 33614825 | + | lrr_1/ llr_2/llr_8                                                                                             |
|     |             |      | <i>Glyma.16g175100</i> | 33620772 | 33629405 | + | lrr_1/ llr_2/llr_8                                                                                             |
|     | AX-90422071 | Gm18 | <i>Glyma.18g107000</i> | 12028945 | 12032564 | - | Ribose-phosphate pyrophospho kinase4                                                                           |
|     |             |      | <i>Glyma.18g107100</i> | 12047167 | 12050021 | + | Ancient ubiquitous protein1                                                                                    |
|     |             |      | <i>Glyma.18g107200</i> | 12059922 | 12060860 | - | Peptidase of plants and bacteria (bsp)                                                                         |
|     |             |      | <i>Glyma.18g107300</i> | 12091200 | 12095291 | - | Carbohydrate-binding x8 domain-containing protein                                                              |
|     |             |      | <i>Glyma.18g107400</i> | 12099175 | 12100330 | - | _                                                                                                              |
|     |             |      | <i>Glyma.18g107500</i> | 12116972 | 12118952 | + | Mitochondrial transcription termination factor family protein-related                                          |
|     |             |      | <i>Glyma.18g107600</i> | 12164801 | 12170095 | - | Protein kinase family protein                                                                                  |
|     |             |      | <i>Glyma.18g107700</i> | 12207661 | 12208644 | - | Gag-polypeptide of ltrcopia-type (ubn2_3)                                                                      |
|     |             |      | <i>Glyma.18g107800</i> | 12208710 | 12212011 | - | _                                                                                                              |
|     |             |      | <i>Glyma.18g107900</i> | 12220182 | 12260477 | + | Callose synthase7-related                                                                                      |
|     |             |      | <i>Glyma.18g108000</i> | 12221736 | 12225257 | - | Dnahelicasepif1/rrm3                                                                                           |
| LAL | AX-90523253 | Gm02 | <i>Glyma.02g237600</i> | 42597212 | 42600960 | - | Metal tolerance protein c3-related                                                                             |
|     |             |      | <i>Glyma.02g237400</i> | 42580305 | 42582359 | + | Leucine-rich repeat-containing protein                                                                         |
|     |             |      | <i>Glyma.02g237500</i> | 42582609 | 42591402 | - | B3DNA binding domain (b3)                                                                                      |
|     |             |      | <i>Glyma.02g237700</i> | 42602537 | 42604779 | - | Protein of unknown function (duf2741)                                                                          |
|     |             |      | <i>Glyma.02g237800</i> | 42607230 | 42611324 | - | RNA binding protein related                                                                                    |
|     |             |      | <i>Glyma.02g237900</i> | 42615776 | 42617153 | - | Protein of unknown function (duf1191)                                                                          |
|     |             |      | <i>Glyma.02g238000</i> | 42627584 | 42631716 | + | _                                                                                                              |
|     |             |      | <i>Glyma.02g238100</i> | 42635741 | 42643194 | - | Nicotinate-nucleotide diphosphorylase (carboxylating)/quinolinate phosphoribosyl transferase (decarboxylating) |

|  |                                           |      |                        |          |          |   |                                                                              |
|--|-------------------------------------------|------|------------------------|----------|----------|---|------------------------------------------------------------------------------|
|  |                                           |      | <i>Glyma.02g238200</i> | 42645706 | 42649807 | - | UDPglucuronate:xylnalalpha-glucuronosyl transferase3-related                 |
|  |                                           |      | <i>Glyma.02g238300</i> | 42672255 | 42689914 | - | ATP-binding cassette sub-family Bmember6, mitochondrial                      |
|  |                                           |      | <i>Glyma.02g238400</i> | 42692884 | 42703545 | - | Cohesin loading factor (cohesin_load)                                        |
|  |                                           |      | <i>Glyma.02g238500</i> | 42709015 | 42712333 | - | Uncharacterized conserved protein                                            |
|  |                                           |      | <i>Glyma.02g238600</i> | 42714308 | 42718195 | - | CT120 protein                                                                |
|  |                                           |      | <i>Glyma.02g238700</i> | 42722617 | 42726326 | - | Inosine-5-monophosphate dehydrogenase related                                |
|  |                                           |      | <i>Glyma.02g238800</i> | 42735396 | 42738350 | + | Oxalyl-coadecarboxylase/oxalyl-coacaroxy-lyase                               |
|  |                                           |      | <i>Glyma.02g238900</i> | 42742465 | 42743004 | - | _                                                                            |
|  |                                           |      | <i>Glyma.02g239000</i> | 42747173 | 42750040 | + | _                                                                            |
|  |                                           |      | <i>Glyma.02g239100</i> | 42754798 | 42755899 | + | Late embryogenesis abundant (lea) hydroxyproline-rich glycol protein-related |
|  | AX-90367890<br>AX-90407903<br>AX-90372917 | Gm02 | <i>Glyma.02g239200</i> | 42757315 | 42763576 | - | Nibrin-related                                                               |
|  |                                           |      | <i>Glyma.02g239300</i> | 42777266 | 42779243 | - | Acyl-activating enzyme5, peroxisomal-related                                 |
|  |                                           |      | <i>Glyma.02g239400</i> | 42784584 | 42786251 | - | Acyl-activating enzyme5, peroxisomal-related                                 |
|  |                                           |      | <i>Glyma.02g239500</i> | 42799982 | 42802509 | - | Acyl-activating enzyme5, peroxisomal-related                                 |
|  |                                           |      | <i>Glyma.02g239600</i> | 42813400 | 42824492 | - | Auxin response factor8                                                       |
|  |                                           |      | <i>Glyma.02g239700</i> | 42839384 | 42841491 | - | 40sribosomal proteins26                                                      |
|  |                                           |      | <i>Glyma.02g239800</i> | 42848299 | 42849703 | + | _                                                                            |
|  |                                           |      | <i>Glyma.02g239900</i> | 42853091 | 42855600 | + | CPG binding protein                                                          |
|  | AX-90456562                               | Gm05 | <i>Glyma.05g224900</i> | 40366096 | 40370669 | - | _                                                                            |
|  |                                           |      | <i>Glyma.05g223000</i> | 40248224 | 40250093 | + | 1-aminocyclopropane-1-carboxylate synthase7                                  |
|  |                                           |      | <i>Glyma.05g223100</i> | 40259388 | 40262641 | + | Mitochondrial ATP synthaseg subunit (ATP-synt_g)                             |

|  |  |  |                        |          |          |   |                                                                                                                                   |
|--|--|--|------------------------|----------|----------|---|-----------------------------------------------------------------------------------------------------------------------------------|
|  |  |  | <i>Glyma.05g223200</i> | 40264775 | 40268360 | + | Regulator of vps4 activity protein-related                                                                                        |
|  |  |  | <i>Glyma.05g223300</i> | 40270196 | 40271323 | + | O-methyl transferase-related                                                                                                      |
|  |  |  | <i>Glyma.05g223400</i> | 40273312 | 40274992 | + | Caffeoyl-coao-methyl transferase/<br>trans-caffeoyl-coa3-o-methyl<br>transferase                                                  |
|  |  |  | <i>Glyma.05g223500</i> | 40275557 | 40278080 | - | 40sribosomal proteins15a-2-related                                                                                                |
|  |  |  | <i>Glyma.05g223600</i> | 40277423 | 40279367 | + | _                                                                                                                                 |
|  |  |  | <i>Glyma.05g223700</i> | 40283806 | 40293124 | + | Insulinase (peptidasefamilym16)<br>protein                                                                                        |
|  |  |  | <i>Glyma.05g223800</i> | 40294131 | 40295090 | + | 60sribosomal protein l31                                                                                                          |
|  |  |  | <i>Glyma.05g223900</i> | 40297233 | 40299773 | + | _                                                                                                                                 |
|  |  |  | <i>Glyma.05g224000</i> | 40300268 | 40303288 | - | Asparagine-trnaligase, mitochondrial-<br>related                                                                                  |
|  |  |  | <i>Glyma.05g224100</i> | 40304087 | 40305165 | + | _                                                                                                                                 |
|  |  |  | <i>Glyma.05g224200</i> | 40307329 | 40312025 | + | SNF7-related                                                                                                                      |
|  |  |  | <i>Glyma.05g224300</i> | 40316985 | 40318520 | - | Myb-like DNA binding protein                                                                                                      |
|  |  |  | <i>Glyma.05g224400</i> | 40325845 | 40327778 | - | Zinc fingerc-x8-c-x5-c-x3-htype<br>(andsimilar) (zf-ccch)                                                                         |
|  |  |  | <i>Glyma.05g224500</i> | 40342583 | 40345336 | + | Inositolxygenase/myo-<br>inositolxygenase                                                                                         |
|  |  |  | <i>Glyma.05g224600</i> | 40345642 | 40345824 | + | _                                                                                                                                 |
|  |  |  | <i>Glyma.05g224700</i> | 40351005 | 40361888 | + | Glycine-rich protein                                                                                                              |
|  |  |  | <i>Glyma.05g224800</i> | 40362481 | 40363717 | - | Clathrin coatassembly protein                                                                                                     |
|  |  |  | <i>Glyma.05g225000</i> | 40376407 | 40381768 | + | Mitochondrial processing<br>peptidase/processing enhancing<br>peptidase                                                           |
|  |  |  | <i>Glyma.05g225100</i> | 40387813 | 40393404 | + | Nac domain containing protein75-<br>related                                                                                       |
|  |  |  | <i>Glyma.05g225200</i> | 40398178 | 40400609 | - | Protein-serine/threonine<br>phosphatase/serine/threonine specific<br>protein phosphatase//protein-tyrosine-<br>phosphatase/ptpase |

|  |             |      |                        |          |          |   |                                                                     |
|--|-------------|------|------------------------|----------|----------|---|---------------------------------------------------------------------|
|  |             |      | <i>Glyma.05g225300</i> | 40408912 | 40410821 | + | Extensin-likeprotein-related                                        |
|  |             |      | <i>Glyma.05g225400</i> | 40412601 | 40415905 | - | Protein of unknown function(duf1005)                                |
|  |             |      | <i>Glyma.05g225500</i> | 40422630 | 40426560 | + | Der1-likeprotein, derlin                                            |
|  |             |      | <i>Glyma.05g225600</i> | 40427955 | 40429788 | + | Profilin                                                            |
|  |             |      | <i>Glyma.05g225700</i> | 40432149 | 40439631 | + | Profilin                                                            |
|  |             |      | <i>Glyma.05g225800</i> | 40441668 | 40445293 | - | Glucanendo-1,3-beta-glucosidase12-related                           |
|  | AX-90365252 | Gm07 | <i>Glyma.07g077700</i> | 7078817  | 7101299  | + | Leucine-rich repeat-containing protein                              |
|  |             |      | <i>Glyma.07g077800</i> | 7101306  | 7102021  | + | —                                                                   |
|  |             |      | <i>Glyma.07g077900</i> | 7116774  | 7117750  | + | —                                                                   |
|  |             |      | <i>Glyma.07g078000</i> | 7121636  | 7126695  | + | Leucine-rich repeat-containing protein                              |
|  |             |      | <i>Glyma.07g078100</i> | 7126750  | 7135963  | + | Leucine rich repeat proteins, some proteins contain f-box           |
|  |             |      | <i>Glyma.07g078200</i> | 7144509  | 7148052  | - | Armadillo/beta-catenin repeat-containing protein-related            |
|  |             |      | <i>Glyma.07g078300</i> | 7150800  | 7154478  | - | Alternative splicing factor srp55/b52/srp75 (rrm superfamily)       |
|  |             |      | <i>Glyma.07g078400</i> | 7152903  | 7153630  | + | —                                                                   |
|  |             |      | <i>Glyma.07g078500</i> | 7152959  | 7153210  | - | Subtilisin-like serineproteas                                       |
|  |             |      | <i>Glyma.07g078600</i> | 7158821  | 7160401  | - | Shnshine, DNA binding/transcription                                 |
|  |             |      | <i>Glyma.07g078700</i> | 7175548  | 7177380  | + | Xyloglucan:xyloglucosyl transferase/xyloglucanendo transglycosylase |
|  |             |      | <i>Glyma.07g078800</i> | 7182128  | 7184201  | + | Ring finger domain-containing                                       |
|  |             |      | <i>Glyma.07g078900</i> | 7187362  | 7192149  | + | Protein-ribulosamine3-kinase/ribulosamine/erythrul osamine3-kinase  |
|  |             |      | <i>Glyma.07g079000</i> | 7193037  | 7202151  | - | Response regulator of two-compon                                    |
|  |             |      | <i>Glyma.07g079100</i> | 7199099  | 7205256  | - | —                                                                   |
|  |             |      | <i>Glyma.07g079200</i> | 7200488  | 7201018  | + | —                                                                   |
|  |             |      | <i>Glyma.07g079300</i> | 7201131  | 7201427  | + | —                                                                   |
|  |             |      | <i>Glyma.07g079400</i> | 7204711  | 7206782  | + | —                                                                   |
|  |             |      | <i>Glyma.07g079500</i> | 7214161  | 7217333  | + | —                                                                   |

|  |             |      |                        |         |         |   |                                                            |
|--|-------------|------|------------------------|---------|---------|---|------------------------------------------------------------|
|  |             |      | <i>Glyma.07g079600</i> | 7237783 | 7238601 | + | Lysm domain (lysm)                                         |
|  |             |      | <i>Glyma.07g079700</i> | 7248737 | 7256522 | + | Arsenite-transporting ATPase/arsenite-translocating ATPase |
|  |             |      | <i>Glyma.07g079800</i> | 7259786 | 7263265 | + | _                                                          |
|  |             |      | <i>Glyma.07g079900</i> | 7266622 | 7267156 | - | Pthr 22811//pthr22811:sf68-trans membrane emp24 domain     |
|  | AX-90477018 | Gm07 | <i>Glyma.07g080400</i> | 7312327 | 7319873 | - | Phospholipased beta1-related                               |
|  |             |      | <i>Glyma.07g080500</i> | 7328383 | 7331416 | - | Subtilisin-like serine protease-related                    |
|  |             |      | <i>Glyma.07g080600</i> | 7336252 | 7339584 | + | Disease resistance family protein/ lrr family              |
|  |             |      | <i>Glyma.07g080700</i> | 7341451 | 7345688 | - | Protein kinase domain (pkinase)/s-locusglycop              |
|  |             |      | <i>Glyma.07g080800</i> | 7358782 | 7367281 | + | Acyltransferase(acyltransferase)/ef                        |
|  |             |      | <i>Glyma.07g080900</i> | 7381339 | 7405785 | + | Mads-box protein soc1                                      |
|  |             |      | <i>Glyma.07g081000</i> | 7423408 | 7424268 | - | ABC transporter transmembrane region                       |
|  |             |      | <i>Glyma.07g081100</i> | 7424545 | 7425990 | - | Cyclin-a2-1-related                                        |
|  |             |      | <i>Glyma.07g081200</i> | 7427658 | 7428245 | - | Maintenance of killer16 mak16 protein-related              |
|  |             |      | <i>Glyma.07g081300</i> | 7442510 | 7449341 | - | Agamous-like MADS-box protein agl13-related                |
|  |             |      | <i>Glyma.07g081400</i> | 7465769 | 7471829 | + | Protein y45f10a.7, isoforma                                |
|  |             |      | <i>Glyma.07g081500</i> | 7472362 | 7475246 | + | Sap18                                                      |
|  |             |      | <i>Glyma.07g081600</i> | 7479732 | 7487620 | + | Polygalacturonate4-alpha-galacturonosyltra                 |
|  | AX-90491184 | Gm11 | <i>Glyma.11g093700</i> | 7111708 | 7115757 | + | Set1/ash2 histone methyl transferase complex sub unit      |
|  |             |      | <i>Glyma.11g093800</i> | 7116433 | 7123292 | - | ATP-binding cassette transporter                           |
|  |             |      | <i>Glyma.11g095000</i> | 7206492 | 7209711 | - | Glucanendo-1,3-beta-d-glucosidase/laminarinase             |
|  |             |      | <i>Glyma.11g093900</i> | 7130214 | 7137304 | - | Sf247-ATP-binding cassette transporter                     |
|  |             |      | <i>Glyma.11g094000</i> | 7140746 | 7145587 | - | _                                                          |
|  |             |      | <i>Glyma.11g094100</i> | 7144509 | 7145178 | + | _                                                          |



|  |                                           |      |                        |          |          |   |                                                                    |
|--|-------------------------------------------|------|------------------------|----------|----------|---|--------------------------------------------------------------------|
|  |                                           |      | <i>Glyma.11g094200</i> | 7147965  | 7152190  | + | Biotin synthase                                                    |
|  |                                           |      | <i>Glyma.11g094300</i> | 7153148  | 7168980  | - | Isoleucine-tRNA ligase/iso leucyl-trna synthetase                  |
|  |                                           |      | <i>Glyma.11g094400</i> | 7170437  | 7174192  | - | 28s ribosomal proteins9, mitochondrial                             |
|  |                                           |      | <i>Glyma.11g094500</i> | 7176300  | 7183060  | - | _                                                                  |
|  |                                           |      | <i>Glyma.11g094600</i> | 7187192  | 7190048  | - | _                                                                  |
|  |                                           |      | <i>Glyma.11g094700</i> | 7190632  | 7195838  | - | Hydroxymethyl bi lanesynthase /uroporphyrinogen synthetase         |
|  |                                           |      | <i>Glyma.11g094800</i> | 7199274  | 7201137  | + | _                                                                  |
|  |                                           |      | <i>Glyma.11g094900</i> | 7202266  | 7203515  | - | Glucanendo-1,3-beta-d-glucosidase/laminarinase                     |
|  |                                           |      | <i>Glyma.11g095100</i> | 7212438  | 7214276  | - | Glucanendo-1,3-beta-d-glucosidase/laminarinase                     |
|  |                                           |      | <i>Glyma.11g095200</i> | 7218860  | 7221194  | - | Glucanendo-1,3-beta-d-glucosidase/laminarinase                     |
|  |                                           |      | <i>Glyma.11g095300</i> | 7222140  | 7235534  | + | DNA jhomolog sub family c member                                   |
|  |                                           |      | <i>Glyma.11g095400</i> | 7236082  | 7240527  | - | Saccharo pinedehydrogenase NADP binding domain                     |
|  |                                           |      | <i>Glyma.11g095500</i> | 7242440  | 7249074  | - | Adaptinc-terminal domain (alpha_adaptinc2)                         |
|  |                                           |      | <i>Glyma.11g095600</i> | 7249880  | 7254364  | - | Hexokinase-3-related                                               |
|  |                                           |      | <i>Glyma.11g095700</i> | 7263413  | 7265368  | - | Ubiquitin-conjugating enzyme E2                                    |
|  |                                           |      | <i>Glyma.11g095800</i> | 7267458  | 7279596  | - | Nucleosome-remodeling factor subunit BPTF                          |
|  |                                           |      | <i>Glyma.11g095900</i> | 7287276  | 7288134  | + | Probable lipid transfer (ltp_2)                                    |
|  |                                           |      | <i>Glyma.11g096000</i> | 7294150  | 7296623  | - | Gras domain family(gras)                                           |
|  |                                           |      | <i>Glyma.11g096100</i> | 7299741  | 7307551  | - | Proteins-acyl transferase 19-related                               |
|  | AX-90348822<br>AX-90337775<br>AX-90498877 | Gm11 | <i>Glyma.11g096200</i> | 7315127  | 7325455  | + | 4-amino butyrate--2-oxoglutarate transaminase/gamma-amino-n-butyra |
|  |                                           |      | <i>Glyma.11g096300</i> | 7325956  | 7326700  | - | _                                                                  |
|  | AX-90443985<br>AX-90340335                | Gm11 | <i>Glyma.11g209100</i> | 30057154 | 30061089 | + | Monodehydro ascorbate reductase, cytoplasm                         |
|  |                                           |      | <i>Glyma.11g209200</i> | 30063770 | 30065301 | - | 60s acidic ribosomal proteinp2                                     |

|            |                                           |      |                        |          |          |   |                                                                         |
|------------|-------------------------------------------|------|------------------------|----------|----------|---|-------------------------------------------------------------------------|
|            |                                           |      | <i>Glyma.11g209300</i> | 30097729 | 30105137 | + | 6-dioxo-6-phenylhexa-3-enoatehydrolase/ hohpdahydrolase                 |
|            |                                           |      | <i>Glyma.11g209400</i> | 30105649 | 30106749 | - | Germin-like protein sub family 3 member                                 |
|            |                                           |      | <i>Glyma.11g209500</i> | 30131080 | 30134126 | + | Protein terminal flower1                                                |
|            |                                           |      | <i>Glyma.11g209600</i> | 30147295 | 30159083 | + | Protease u48 caaxprenyl protease rce1                                   |
|            |                                           |      | <i>Glyma.11g209700</i> | 30163931 | 30165878 | - | Protein little zipper3                                                  |
|            |                                           |      | <i>Glyma.11g209800</i> | 30180779 | 30182096 | + | Purple acid phosphatase 21-related                                      |
|            |                                           |      | <i>Glyma.11g209900</i> | 30188618 | 30192948 | - | Zinc finger five domain containin GP                                    |
|            |                                           |      | <i>Glyma.11g210000</i> | 30206429 | 30207913 | - | An1-type zinc finger protein                                            |
|            |                                           |      | <i>Glyma.11g210100</i> | 30223531 | 30231651 | + | Transcription initiation factort FIID subunit12                         |
|            |                                           |      | <i>Glyma.11g210200</i> | 30234588 | 30237609 | + | Lysm domain (lysm)                                                      |
|            |                                           |      | <i>Glyma.11g210300</i> | 30238668 | 30248611 | - | Tri hydroxy ptero carpandi methyl allyl transferase/glyceollin synthase |
|            | AX-90362827<br>AX-90513611<br>AX-90396575 | Gm18 | <i>Glyma.18g104500</i> | 11526580 | 11531654 | - | Plant mobile domain (pmd)                                               |
|            |                                           |      | <i>Glyma.18g104600</i> | 11541115 | 11551882 | - | Serine/threonine-protein phosphatase 5                                  |
|            |                                           |      | <i>Glyma.18g105000</i> | 11665406 | 11665918 | + | _                                                                       |
|            |                                           |      | <i>Glyma.18g104700</i> | 11598036 | 11603174 | + | Helicase (herpes_helicase)/ pif1-like helicase                          |
|            |                                           |      | <i>Glyma.18g104800</i> | 11608502 | 11608894 | - | _                                                                       |
|            |                                           |      | <i>Glyma.18g104900</i> | 11656641 | 11665405 | + | _                                                                       |
|            |                                           |      | <i>Glyma.18g105100</i> | 11680805 | 11684730 | + | Leucine-rich repeat- containing protein                                 |
|            |                                           |      | <i>Glyma.18g105200</i> | 11694516 | 11696250 | + | Leucine-rich repeat-containing protetein                                |
|            |                                           |      | <i>Glyma.18g105300</i> | 11696911 | 11697669 | + | Leucine-richrepeat-containing protein                                   |
|            |                                           |      | <i>Glyma.18g105400</i> | 11702349 | 11704712 | - | Hva22-like prote                                                        |
|            |                                           |      | <i>Glyma.18g105500</i> | 11705137 | 11710003 | - | Protein huellenlos                                                      |
|            |                                           |      | <i>Glyma.18g105600</i> | 11715984 | 11723202 | + | Bed finger-related                                                      |
|            |                                           |      | <i>Glyma.18g105700</i> | 11731323 | 11732124 | + | Endonuclease/ exonuclease/ phosphatase family                           |
| <b>TRL</b> | AX-90431861                               | Gm06 | <i>Glyma.06g040900</i> | 3084559  | 3086167  | - | Heat stress transcription factorb-4                                     |

|  |                                           |      |                        |         |         |   |                                                            |
|--|-------------------------------------------|------|------------------------|---------|---------|---|------------------------------------------------------------|
|  |                                           |      | <i>Glyma.06g041000</i> | 3104225 | 3111827 | - | Ring finger domain-containing                              |
|  |                                           |      | <i>Glyma.06g041100</i> | 3118193 | 3119768 | - | _                                                          |
|  |                                           |      | <i>Glyma.06g041200</i> | 3121756 | 3122364 | - | Transferase family (transferase)                           |
|  |                                           |      | <i>Glyma.06g041300</i> | 3122900 | 3124901 | - | Transferase family (transferase)                           |
|  |                                           |      | <i>Glyma.06g041400</i> | 3132564 | 3136289 | - | Transferase family (transferase)                           |
|  |                                           |      | <i>Glyma.06g041500</i> | 3139829 | 3144620 | + | Atp-dependent protease cereblon                            |
|  |                                           |      | <i>Glyma.06g041600</i> | 3145139 | 3145351 | - | _                                                          |
|  |                                           |      | <i>Glyma.06g041700</i> | 3147768 | 3152655 | - | RNA recognition motif                                      |
|  |                                           |      | <i>Glyma.06g041800</i> | 3161791 | 3163327 | - | Wuschel-related homeo box4                                 |
|  |                                           |      | <i>Glyma.06g041900</i> | 3169816 | 3171166 | - | _                                                          |
|  |                                           |      | <i>Glyma.06g042000</i> | 3178447 | 3178644 | - | _                                                          |
|  |                                           |      | <i>Glyma.06g042100</i> | 3179113 | 3180503 | - | Ethylene-responsive transcription factored f008            |
|  |                                           |      | <i>Glyma.06g042200</i> | 3180855 | 3181761 | + | _                                                          |
|  |                                           |      | <i>Glyma.06g042300</i> | 3194307 | 3197140 | + | Ranbinding protein 9-related                               |
|  |                                           |      | <i>Glyma.06g042400</i> | 3212730 | 3225119 | + | Kinesin-like protein-related                               |
|  |                                           |      | <i>Glyma.06g042500</i> | 3226378 | 3229165 | - | Serine/threonine protein kinase/tgf-beta stimulated factor |
|  |                                           |      | <i>Glyma.06g042600</i> | 3233956 | 3236966 | + | Cysteine protease component of protease                    |
|  |                                           |      | <i>Glyma.06g042700</i> | 3240841 | 3243050 | - | Serine/threonine-protein kinase wnk                        |
|  |                                           |      | <i>Glyma.06g042800</i> | 3246839 | 3248053 | - | F-box protein skip2                                        |
|  |                                           |      | <i>Glyma.06g042900</i> | 3264037 | 3266176 | + | Cyclin                                                     |
|  | AX-90446460<br>AX-90414551<br>AX-90472866 | Gm11 | <i>Glyma.11g055600</i> | 4200285 | 4203022 | - | Remorin, c-terminal region (remorin_c)                     |
|  |                                           |      | <i>Glyma.11g055700</i> | 4207710 | 4216150 | + | Zeaxanthine oxidase, chloroplastic                         |
|  |                                           |      | <i>Glyma.11g055800</i> | 4220955 | 4221185 | - | _                                                          |
|  |                                           |      | <i>Glyma.11g055900</i> | 4221420 | 4223125 | - | _                                                          |
|  |                                           |      | <i>Glyma.11g056000</i> | 4234567 | 4239763 | - | Swap mRNA splicing regulator                               |
|  |                                           |      | <i>Glyma.11g056100</i> | 4246705 | 4248880 | + | Protein of unknown function (duf1685)                      |
|  |                                           |      | <i>Glyma.11g056200</i> | 4254959 | 4257382 | + | Heat stress transcription factor B-1                       |
|  |                                           |      | <i>Glyma.11g056300</i> | 4255281 | 4255406 | + | _                                                          |
|  |                                           |      | <i>Glyma.11g056400</i> | 4259181 | 4260890 | + | RNA helicase                                               |

|    |                                                          |      |                        |         |         |   |                                                             |
|----|----------------------------------------------------------|------|------------------------|---------|---------|---|-------------------------------------------------------------|
|    |                                                          |      | <i>Glyma.11g056500</i> | 4265079 | 4266558 | + | Ef hand(ef-hand_1)/ ef hand(ef-hand_5)                      |
|    |                                                          |      | <i>Glyma.11g056600</i> | 4272400 | 4273766 | + | Emb                                                         |
|    |                                                          |      | <i>Glyma.11g056700</i> | 4282555 | 4284383 | - | Cyclin-dependent kinase inhibitor 6                         |
|    |                                                          |      | <i>Glyma.11g056800</i> | 4296965 | 4298290 | + | Methionine amino peptidase1d, mitochondrial                 |
|    |                                                          |      | <i>Glyma.11g056900</i> | 4298795 | 4300993 | - | Ca2+-independent phosphor lipasea2                          |
|    |                                                          |      | <i>Glyma.11g057000</i> | 4304933 | 4309655 | + | Sulfo transferase domain (sulfotransfer_1)                  |
|    |                                                          |      | <i>Glyma.11g057100</i> | 4313411 | 4314027 | + | _                                                           |
|    |                                                          |      | <i>Glyma.11g057200</i> | 4320409 | 4321206 | + | _                                                           |
|    |                                                          |      | <i>Glyma.11g057300</i> | 4326263 | 4326902 | + | _                                                           |
|    |                                                          |      | <i>Glyma.11g057400</i> | 4332503 | 4333352 | + | _                                                           |
|    |                                                          |      | <i>Glyma.11g057500</i> | 4341698 | 4347460 | + | Uncharacterized conserved protein                           |
|    |                                                          |      | <i>Glyma.11g057600</i> | 4352469 | 4357731 | + | Protein of unknown function, duf547 /leucine-zip            |
|    |                                                          |      | <i>Glyma.11g057700</i> | 4358078 | 4359945 | - | Transducin/wd40 domain-containing protein                   |
|    |                                                          |      | <i>Glyma.11g057800</i> | 4361981 | 4364146 | + | 17-beta-estradiol17-dehydrogenase/estrogen17-oxidoreductase |
|    |                                                          |      | <i>Glyma.11g057900</i> | 4367145 | 4369966 | - | Sf2-sap domain-containing protein                           |
|    |                                                          |      | <i>Glyma.11g058000</i> | 4370574 | 4376076 | - | Serine/threonine-protein kinase                             |
|    |                                                          |      | <i>Glyma.11g058100</i> | 4384247 | 4386065 | - | Peroxidase/lactoperoxidase                                  |
|    |                                                          |      | <i>Glyma.11g058200</i> | 4390109 | 4390700 | - | _                                                           |
|    |                                                          |      | <i>Glyma.11g058300</i> | 4392607 | 4397689 | - | Mitogen-activated kinase kinasekinas                        |
|    |                                                          |      | <i>Glyma.11g058400</i> | 4409851 | 4413688 | + | Protein of unknown function duf260                          |
|    |                                                          |      | <i>Glyma.11g058500</i> | 4417029 | 4423791 | - | Tubulin-relatedprotein                                      |
|    |                                                          |      | <i>Glyma.11g058600</i> | 4425323 | 4427642 | - | Myb family transcription factor                             |
| NF | AX-90428520<br>AX-90467878<br>AX-90468823<br>AX-90412442 | Gm08 | <i>Glyma.08g081500</i> | 6152552 | 6161571 | - | Histidin oldehydrogenase hdh                                |
|    |                                                          |      | <i>Glyma.08g080000</i> | 6076298 | 6077881 | + | Berberine bridge enzyme-like protein-related                |
|    |                                                          |      | <i>Glyma.08g080100</i> | 6079968 | 6081557 | - | Berberine bridge enzyme-related                             |

|  |  |      |                        |         |         |   |                                                                            |
|--|--|------|------------------------|---------|---------|---|----------------------------------------------------------------------------|
|  |  |      | <i>Glyma.08g080200</i> | 6084010 | 6085893 | + | Tetrahydro berberine oxidase/<br>thboxidase                                |
|  |  |      | <i>Glyma.08g080300</i> | 6086733 | 6088550 | + | Ppr repeat (ppr)/ dyw family of nucleic<br>acid deaminases                 |
|  |  |      | <i>Glyma.08g080400</i> | 6092714 | 6096079 | + | Sf34-f22m8.11protein-related                                               |
|  |  |      | <i>Glyma.08g080500</i> | 6097769 | 6099931 | + | Sf34-f22m8.11protein-related                                               |
|  |  |      | <i>Glyma.08g080600</i> | 6115848 | 6117996 | + | Berberine bridge enzyme-related                                            |
|  |  |      | <i>Glyma.08g080700</i> | 6119523 | 6122290 | + | Berberine bridge enzyme-related                                            |
|  |  |      | <i>Glyma.08g080800</i> | 6123319 | 6124310 | - | _                                                                          |
|  |  |      | <i>Glyma.08g080900</i> | 6127342 | 6129511 | + | Berberine bridge enzyme-related                                            |
|  |  |      | <i>Glyma.08g081000</i> | 6133267 | 6136646 | - | Fatty acid hydroxylase                                                     |
|  |  |      | <i>Glyma.08g081100</i> | 6137956 | 6140938 | - | Tubulinbeta-4chain-related                                                 |
|  |  |      | <i>Glyma.08g081200</i> | 6142155 | 6143076 | + | Cupin domain (cupin_2)                                                     |
|  |  |      | <i>Glyma.08g081300</i> | 6145003 | 6149493 | - | N-acetyl glucosaminyl phosphatidyl<br>inositoldeacetylase/ n-acetylglucosa |
|  |  |      | <i>Glyma.08g081400</i> | 6152131 | 6155753 | + | Protein phosphatase 2c28-related                                           |
|  |  |      | <i>Glyma.08g081600</i> | 6162265 | 6170670 | - | Hen1                                                                       |
|  |  |      | <i>Glyma.08g081700</i> | 6174443 | 6177152 | - | Stressup-regulated nod19 (surnod19)                                        |
|  |  |      | <i>Glyma.08g081800</i> | 6178646 | 6180153 | - | Stressup-regulated nod19 (surnod19)                                        |
|  |  |      | <i>Glyma.08g081900</i> | 6182127 | 6185682 | - | Protein pmt-1,isoformb                                                     |
|  |  |      | <i>Glyma.08g082000</i> | 6188267 | 6192585 | - | 26s proteasomenon-ATPase regulatory<br>subunit8                            |
|  |  |      | <i>Glyma.08g082100</i> | 6196059 | 6199325 | + | Programmed cell death protein5                                             |
|  |  |      | <i>Glyma.08g082200</i> | 6202794 | 6210874 | + | Potassium inward rectifier (kir)-like<br>channe l3                         |
|  |  |      | <i>Glyma.08g082300</i> | 6206872 | 6207344 | + | _                                                                          |
|  |  |      | <i>Glyma.08g082400</i> | 6229164 | 6231818 | + | Wrky transcription factor 28-related                                       |
|  |  |      | <i>Glyma.08g082500</i> | 6244916 | 6252372 | + | O-acetyl transferase cas1p-like protein-<br>related                        |
|  |  |      | <i>Glyma.08g082600</i> | 6256587 | 6266032 | + | Putative dynamitin                                                         |
|  |  |      | <i>Glyma.08g082700</i> | 6266414 | 6268400 | - | U6s nrna-associated protein                                                |
|  |  | Gm08 | <i>Glyma.08g093300</i> | 7072042 | 7076041 | - | Tartrate-resistant acid phosphatase<br>type5                               |

|  |                                           |  |                        |         |         |   |                                                          |
|--|-------------------------------------------|--|------------------------|---------|---------|---|----------------------------------------------------------|
|  | AX-90493535<br>AX-90455156<br>AX-90331992 |  | <i>Glyma.08g093400</i> | 7084753 | 7087202 | + | Hetero dimeric geranyl geranyl pyro phosphates           |
|  |                                           |  | <i>Glyma.08g093500</i> | 7088454 | 7092027 | + | Tartrate-resistant acid phosphatase type5                |
|  |                                           |  | <i>Glyma.08g093600</i> | 7092593 | 7098413 | + | Tartrate-resistant acid phosphatase type5                |
|  |                                           |  | <i>Glyma.08g093700</i> | 7097206 | 7101441 | - | Procollagen-proline3-dioxygenase/ prolyl3-hydroxylase    |
|  |                                           |  | <i>Glyma.08g093800</i> | 7102857 | 7109102 | - | Hydroxyproline-rich glycoprotein-like protein            |
|  |                                           |  | <i>Glyma.08g093900</i> | 7120394 | 7123346 | - | Xylo glucanendo transglucosylase                         |
|  |                                           |  | <i>Glyma.08g094000</i> | 7139990 | 7141988 | + | Transmembrane ascorbate ferri reductase3-rel             |
|  |                                           |  | <i>Glyma.08g094100</i> | 7145070 | 7149534 | - | Proteinoberon3                                           |
|  |                                           |  | <i>Glyma.08g094200</i> | 7157662 | 7163180 | - | Early growth response protein-related                    |
|  |                                           |  | <i>Glyma.08g094300</i> | 7160799 | 7160957 | + | _                                                        |
|  |                                           |  | <i>Glyma.08g094400</i> | 7174551 | 7178950 | - | Protein kinase domain (pkinase)/wall-associated          |
|  |                                           |  | <i>Glyma.08g094500</i> | 7184460 | 7192472 | + | Protein of unknown function (duf789)                     |
|  |                                           |  | <i>Glyma.08g094600</i> | 7195107 | 7198806 | - | Enolase superfamily, mandel ateracemase                  |
|  |                                           |  | <i>Glyma.08g094700</i> | 7205721 | 7208341 | - | Mitochondrial 28s ribosomal proteins28                   |
|  |                                           |  | <i>Glyma.08g094800</i> | 7209255 | 7213386 | - | Non-specific serine/ threonine protein kinase            |
|  |                                           |  | <i>Glyma.08g094900</i> | 7218371 | 7222854 | - | IFA-binding protein                                      |
|  |                                           |  | <i>Glyma.08g095000</i> | 7230311 | 7239978 | - | Clathrin assembly protein                                |
|  |                                           |  | <i>Glyma.08g095100</i> | 7242895 | 7244309 | + | NADH dehydrogenase trans membrane subunit                |
|  |                                           |  | <i>Glyma.08g095200</i> | 7245023 | 7250047 | - | Uncharacterized conserved protein                        |
|  |                                           |  | <i>Glyma.08g095300</i> | 7258432 | 7260587 | - | Proteinagamous-like82                                    |
|  |                                           |  | <i>Glyma.08g095400</i> | 7267235 | 7270875 | + | Iso amylacetate-hydrolyzin gesterase and related enzymes |

|  |                                                                         |      |                        |         |         |   |                                                                  |
|--|-------------------------------------------------------------------------|------|------------------------|---------|---------|---|------------------------------------------------------------------|
|  | AX-90365804                                                             | Gm09 | <i>Glyma.09g051100</i> | 4454515 | 4461881 | + | Cellulose synthase acatalytic subunit7                           |
|  |                                                                         |      | <i>Glyma.09g050200</i> | 4367844 | 4370056 | + | Cationic amino acid transporter5                                 |
|  |                                                                         |      | <i>Glyma.09g050300</i> | 4373865 | 4377763 | + | Protein kinase domain (pkinase)                                  |
|  |                                                                         |      | <i>Glyma.09g050400</i> | 4379081 | 4379851 | - | _                                                                |
|  |                                                                         |      | <i>Glyma.09g050500</i> | 4380780 | 4383807 | - | PPR repeat (ppr)/ppr repeat family (ppr_2)                       |
|  |                                                                         |      | <i>Glyma.09g050600</i> | 4384885 | 4387181 | - | Cationic amino acid transporter 5                                |
|  |                                                                         |      | <i>Glyma.09g050700</i> | 4401152 | 4405156 | - | Halo acid dehalogenase-like hydrolas                             |
|  |                                                                         |      | <i>Glyma.09g050800</i> | 4413615 | 4418223 | - | All antoate deiminase                                            |
|  |                                                                         |      | <i>Glyma.09g050900</i> | 4447546 | 4450090 | + | Poly galacturonase QRT3                                          |
|  |                                                                         |      | <i>Glyma.09g051000</i> | 4452259 | 4453424 | + | _                                                                |
|  |                                                                         |      | <i>Glyma.09g051200</i> | 4464563 | 4473730 | - | Choline-phosphatecytidyltransferase/phosphorylcholinetransferase |
|  |                                                                         |      | <i>Glyma.09g051300</i> | 4470781 | 4470999 | + | _                                                                |
|  |                                                                         |      | <i>Glyma.09g051400</i> | 4480786 | 4483499 | - | S-adenosyl-l-methionine-dependentmethyltrans                     |
|  |                                                                         |      | <i>Glyma.09g051500</i> | 4488096 | 4493102 | - | Protein trigalactosyl di acylglycerol 4                          |
|  |                                                                         |      | <i>Glyma.09g051600</i> | 4494692 | 4498211 | - | Calicylin binding protein                                        |
|  |                                                                         |      | <i>Glyma.09g051700</i> | 4494923 | 4495081 | + | _                                                                |
|  |                                                                         |      | <i>Glyma.09g051800</i> | 4499012 | 4503649 | - | Eukaryotic mitochondrial regulator protein (bot1p)               |
|  |                                                                         |      | <i>Glyma.09g051900</i> | 4508892 | 4509626 | - | Vqmotif(vq)                                                      |
|  |                                                                         |      | <i>Glyma.09g052000</i> | 4519979 | 4527492 | - | E1-e2atpase(e1-e2_atpase)/ heavy-metal-                          |
|  |                                                                         |      | <i>Glyma.09g052100</i> | 4536612 | 4538089 | + | 60s ribosomal protein l27                                        |
|  |                                                                         |      | <i>Glyma.09g052200</i> | 4540284 | 4557984 | + | Set domain (set)/gyf domain (gyf)                                |
|  |                                                                         |      | <i>Glyma.09g052300</i> | 4557593 | 4557820 | + | _                                                                |
|  | AX-90495283<br>AX-90449059<br>AX-90520390<br>AX-90434197<br>AX-90498061 | Gm09 | <i>Glyma.09g073400</i> | 7732397 | 7733253 | - | Auxin responsive protein (auxin_inducible)                       |
|  |                                                                         |      | <i>Glyma.09g072600</i> | 7590260 | 7593045 | + | 40s ribosomal proteins 3a                                        |
|  |                                                                         |      | <i>Glyma.09g072700</i> | 7619132 | 7620402 | - | Pectin esterase/pectin methyl esterase                           |
|  |                                                                         |      | <i>Glyma.09g072800</i> | 7633793 | 7634182 | - | _                                                                |

|    |                                           |      |                        |          |          |   |                                                            |
|----|-------------------------------------------|------|------------------------|----------|----------|---|------------------------------------------------------------|
|    | AX-90419697<br>AX-90492156<br>AX-90493039 |      | <i>Glyma.09g072900</i> | 7645379  | 7646352  | + | Myb/sant-likedna-binding domain (myb_dna-bind_3)           |
|    |                                           |      | <i>Glyma.09g073000</i> | 7650927  | 7651406  | - | _                                                          |
|    |                                           |      | <i>Glyma.09g073100</i> | 7654381  | 7657822  | - | Predicted transposase                                      |
|    |                                           |      | <i>Glyma.09g073200</i> | 7697529  | 7708882  | - | Respiratory burst oxidase homolog protein                  |
|    |                                           |      | <i>Glyma.09g073300</i> | 7723202  | 7726373  | + | Auxin-responsive protein-like protein-related              |
|    |                                           |      | <i>Glyma.09g073500</i> | 7756930  | 7758261  | + | Vacuolar sorting protein35                                 |
|    |                                           |      | <i>Glyma.09g073600</i> | 7809852  | 7816248  | - | Sucrose synthase1-related                                  |
| NT | AX-90522644<br>AX-90466067<br>AX-90467825 | Gm01 | <i>Glyma.01g219800</i> | 54913356 | 54934465 | - | Lysine-specificdemethylaselid                              |
|    |                                           |      | <i>Glyma.01g218100</i> | 54819025 | 54824457 | + | Myosin heavy chain-related protein                         |
|    |                                           |      | <i>Glyma.01g218200</i> | 54828960 | 54830170 | - | Lurp-one-related (lor)                                     |
|    |                                           |      | <i>Glyma.01g218300</i> | 54838494 | 54842120 | + | Deoxy nucleotidyl transferase terminal                     |
|    |                                           |      | <i>Glyma.01g218400</i> | 54842601 | 54846844 | + | Kdellys-asp-glu-leucontaining-rela                         |
|    |                                           |      | <i>Glyma.01g218500</i> | 54847794 | 54848478 | - | Expressedprotein                                           |
|    |                                           |      | <i>Glyma.01g218600</i> | 54849376 | 54854956 | - | Expressedprotein                                           |
|    |                                           |      | <i>Glyma.01g218700</i> | 54857259 | 54858579 | - | _                                                          |
|    |                                           |      | <i>Glyma.01g218800</i> | 54860809 | 54866642 | + | Protein tyrosine kinase (pkinase_tyr)/ leucine rich repeat |
|    |                                           |      | <i>Glyma.01g218900</i> | 54866798 | 54868389 | - | Actin-depolymerizingfactor10-related                       |
|    |                                           |      | <i>Glyma.01g219000</i> | 54870113 | 54875022 | + | E1-e2atpase(e1-e2_atpase)/ heavy-metal-associated          |
|    |                                           |      | <i>Glyma.01g219100</i> | 54880250 | 54888021 | + | E1-e2atpase(e1-e2_atpase)/heavy-metal-                     |
|    |                                           |      | <i>Glyma.01g219200</i> | 54889915 | 54895017 | + | C2calcium/lipid-binding plant phosphoribosylt              |
|    |                                           |      | <i>Glyma.01g219300</i> | 54895767 | 54897277 | + | Exo stosin family protein-related                          |
|    |                                           |      | <i>Glyma.01g219400</i> | 54898589 | 54899940 | + | Glutathione peroxidase                                     |
|    |                                           |      | <i>Glyma.01g219500</i> | 54901381 | 54901854 | + | Glutathione peroxidase8-related                            |
|    |                                           |      | <i>Glyma.01g219600</i> | 54903061 | 54907533 | - | At hook motif DNA-binding family protein                   |



|  |                                                                         |      |                        |          |          |   |                                                     |
|--|-------------------------------------------------------------------------|------|------------------------|----------|----------|---|-----------------------------------------------------|
|  |                                                                         |      | <i>Glyma.01g219700</i> | 54908697 | 54911774 | - | Poly nucleotidyl transferase/<br>ribonuclease H-lik |
|  |                                                                         |      | <i>Glyma.01g219900</i> | 54935370 | 54941060 | + | Glutamate – cysteine ligase                         |
|  |                                                                         |      | <i>Glyma.01g220000</i> | 54942535 | 54944623 | + | RNAse prpr2/ rpp21/ snm1 subunit<br>domain(rpr2)    |
|  |                                                                         |      | <i>Glyma.01g220100</i> | 54947015 | 54948375 | + | Bromo-adjacent homology (bah)<br>domain-containing  |
|  |                                                                         |      | <i>Glyma.01g220200</i> | 54950379 | 54954980 | + | Bromo-adjacent homology (bah)<br>domain-containing  |
|  |                                                                         |      | <i>Glyma.01g220300</i> | 54959627 | 54963856 | + | duf3527                                             |
|  |                                                                         |      | <i>Glyma.01g220400</i> | 54964945 | 54971202 | + | Signalpeptidepeptidase-like4                        |
|  |                                                                         |      | <i>Glyma.01g220500</i> | 54969086 | 54969580 | + | _                                                   |
|  |                                                                         |      | <i>Glyma.01g220600</i> | 54974523 | 54976556 | + | Aquaporinpip1-4-related                             |
|  |                                                                         |      | <i>Glyma.01g220700</i> | 54977695 | 54985676 | - | Mitogen-activated kinase kinase                     |
|  |                                                                         |      | <i>Glyma.01g220800</i> | 54988418 | 54991271 | - | _                                                   |
|  |                                                                         |      | <i>Glyma.01g220900</i> | 55000110 | 55006202 | + | Tir domain (tir_2)                                  |
|  |                                                                         |      | <i>Glyma.01g221000</i> | 55007371 | 55009590 | - | Ring finger containing protein                      |
|  |                                                                         |      | <i>Glyma.01g221100</i> | 55018468 | 55020621 | - | Sf20-cctmotiffamilyprotein                          |
|  |                                                                         |      | <i>Glyma.01g221200</i> | 55022862 | 55025351 | + | Plac8family(plac8)                                  |
|  |                                                                         |      | <i>Glyma.01g221300</i> | 55027025 | 55028244 | - | Anaphase-promoting complex(apc),<br>subunit11       |
|  | AX-90430136<br>AX-90419830<br>AX-90317331                               | Gm09 | <i>Glyma.09g073700</i> | 7863209  | 7879959  | - | Inositol5-phosphatase                               |
|  | AX-90313864                                                             |      | <i>Glyma.09g073800</i> | 7897323  | 7901496  | - | Zinc finger five domain containin gpr               |
|  | AX-90431604<br>AX-90382601<br>AX-90312113<br>AX-90455909<br>AX-90306078 | Gm09 | <i>Glyma.09g073900</i> | 7920912  | 7922111  | - | Expressed protein                                   |
|  |                                                                         |      | <i>Glyma.09g074000</i> | 7924556  | 7927259  | - | Zinc finger five domain containin gpr               |
|  |                                                                         |      | <i>Glyma.09g074100</i> | 7943646  | 7949050  | + | Red protein IK factor cytokine                      |
|  | AX-90325580<br>AX-90370286<br>AX-90457815                               | Gm13 | <i>Glyma.13g263800</i> | 36698350 | 36700879 | - | Oxidoreductase, 2og-feiioxygenasef                  |
|  |                                                                         |      | <i>Glyma.13g261800</i> | 36568871 | 36570396 | + | 11-oxo-beta-amyrin30-<br>oxidase/cyp72a154          |

|                                                                         |  |  |                        |          |          |   |                                                   |
|-------------------------------------------------------------------------|--|--|------------------------|----------|----------|---|---------------------------------------------------|
| AX-90452276<br>AX-90480597<br>AX-90305162<br>AX-90433497<br>AX-90383650 |  |  | <i>Glyma.13g261700</i> | 36553556 | 36556696 | - | 11-oxo-beta-amyirin30-oxidase/cyp72a154           |
|                                                                         |  |  | <i>Glyma.13g261900</i> | 36571819 | 36576038 | + | Protease family S26 mitochondrialinn              |
|                                                                         |  |  | <i>Glyma.13g262000</i> | 36579260 | 36585256 | - | 11-oxo-beta-amyirin30-oxidase/cyp72a154           |
|                                                                         |  |  | <i>Glyma.13g262100</i> | 36586108 | 36589827 | - | 11-oxo-beta-amyirin30-oxidase/cyp72a154           |
|                                                                         |  |  | <i>Glyma.13g262200</i> | 36591312 | 36595829 | - | Hepta prenyl diphosphate synthase                 |
|                                                                         |  |  | <i>Glyma.13g262300</i> | 36592394 | 36593638 | + | _                                                 |
|                                                                         |  |  | <i>Glyma.13g262400</i> | 36600186 | 36601991 | - | Carbohydrate-binding x8 domain-containing protein |
|                                                                         |  |  | <i>Glyma.13g262500</i> | 36603843 | 36608523 | + | Chalcone isomerase                                |
|                                                                         |  |  | <i>Glyma.13g262600</i> | 36612366 | 36614107 | - | Purinepermease11-related                          |
|                                                                         |  |  | <i>Glyma.13g262700</i> | 36617625 | 36621135 | + | Emb                                               |
|                                                                         |  |  | <i>Glyma.13g262800</i> | 36625422 | 36628081 | + | Emb                                               |
|                                                                         |  |  | <i>Glyma.13g262900</i> | 36635322 | 36637117 | + | Emb                                               |
|                                                                         |  |  | <i>Glyma.13g263000</i> | 36643870 | 36645875 | + | Fbd( fbd)                                         |
|                                                                         |  |  | <i>Glyma.13g263100</i> | 36651160 | 36653640 | + | Fbd (fbd)                                         |
|                                                                         |  |  | <i>Glyma.13g263200</i> | 36652023 | 36663332 | - | O-methyltransferase                               |
|                                                                         |  |  | <i>Glyma.13g263300</i> | 36664541 | 36668259 | + | Ribokinase                                        |
|                                                                         |  |  | <i>Glyma.13g263400</i> | 36671175 | 36675044 | + | Ribokinase                                        |
|                                                                         |  |  | <i>Glyma.13g263500</i> | 36676213 | 36676962 | + | _                                                 |
|                                                                         |  |  | <i>Glyma.13g263700</i> | 36687392 | 36688292 | - | _                                                 |
|                                                                         |  |  | <i>Glyma.13g263600</i> | 36687392 | 36692071 | + | Mitogen-activated protein kinase18-related        |
|                                                                         |  |  | <i>Glyma.13g263900</i> | 36705555 | 36706942 | - | Oxidoreductase, 2og-feii oxygenase                |
|                                                                         |  |  | <i>Glyma.13g264000</i> | 36707745 | 36709746 | - | Codeine3-o-demethylase/code in eo-demethylase     |
|                                                                         |  |  | <i>Glyma.13g264100</i> | 36711934 | 36719667 | - | Nucleo porin auto peptidase                       |
|                                                                         |  |  | <i>Glyma.13g264200</i> | 36723747 | 36728882 | - | Aceto acetatede carboxylase                       |
|                                                                         |  |  | <i>Glyma.13g264300</i> | 36734670 | 36739644 | - | Sodium/bile acid co transporter 4                 |
|                                                                         |  |  | <i>Glyma.13g264400</i> | 36740782 | 36744087 | - | Rag1-activating protein1                          |

|  |  |  |                        |          |          |   |                                       |
|--|--|--|------------------------|----------|----------|---|---------------------------------------|
|  |  |  | <i>Glyma.13g264500</i> | 36755174 | 36759150 | + | Rhamnose biosynthetic enzyme1-related |
|  |  |  | <i>Glyma.13g264600</i> | 36759779 | 36772020 | - | —                                     |

**Table S4.** List of Genes showed higher expression in root organ/tissue.

| <i>Gene Name</i>       | <b>Start</b> | <b>End</b> | <b>Strand</b> | <b>Description</b>                                                                                                        |
|------------------------|--------------|------------|---------------|---------------------------------------------------------------------------------------------------------------------------|
| <i>Glyma.02g250200</i> | 43779470     | 43781548   | +             | Protein phosphatase 2c3-related                                                                                           |
| <i>Glyma.02g250400</i> | 43786923     | 43791698   | -             | Methyl transferase pmt10-related                                                                                          |
| <i>Glyma.06g126100</i> | 10315437     | 10317265   | -             | Abscisicacid receptor pyl10-related                                                                                       |
| <i>Glyma.06g127500</i> | 10462640     | 10469529   | +             | Splicing factor 3a subunit3                                                                                               |
| <i>Glyma.06g127700</i> | 10486250     | 10492229   | +             | Plastid-lipid-associated protein 14,chloroplastic-related                                                                 |
| <i>Glyma.14g199400</i> | 46435759     | 46438392   | -             | Disease resistance protein rpp13-related                                                                                  |
| <i>Glyma.18g300500</i> | 57841316     | 57843280   | +             | Pirin                                                                                                                     |
| <i>Glyma.18g301700</i> | 57945537     | 57947130   | -             | Brassinosteroid insensitive1-associated receptor kinase1-related                                                          |
| <i>Glyma.18g302100</i> | 57988925     | 57992117   | +             | Cdp-diacylglycerol--glycerol-3-phosphate3-phosphatidyltransferase/phosphatidylglycerophosphatesynthase                    |
| <i>Glyma.03g251500</i> | 44723994     | 44729654   | -             | Serine/threonine-protein phosphatase pp1isozyme2-related                                                                  |
| <i>Glyma.03g251600</i> | 44735415     | 44736486   | -             | Peptidyl-prolylcis-transisomerase cyp18-3-related                                                                         |
| <i>Glyma.03g253100</i> | 44880486     | 44882438   | +             | Beta catenin-related armadillo repeat-containing                                                                          |
| <i>Glyma.06g127800</i> | 10493847     | 10506001   | -             | Histone-lysine n-methyl transferase atx4-related                                                                          |
| <i>Glyma.12g193500</i> | 35498865     | 35503832   | -             | Alcohol dehydrogenase related                                                                                             |
| <i>Glyma.13g162200</i> | 27768047     | 27772562   | -             | Translocase of chloroplast90, chloroplastic                                                                               |
| <i>Glyma.13g163000</i> | 27833892     | 27837459   | -             | Heparanase-like protein3                                                                                                  |
| <i>Glyma.13g163500</i> | 27876748     | 27886905   | +             | Protein phosphatase1, regulatory subunit, and related proteins//leucine rich repeat proteins, some proteins contain f-box |
| <i>Glyma.13g163700</i> | 27895777     | 27898359   | -             | UPF0051protein abci8, chloroplastic-related                                                                               |
| <i>Glyma.02g237800</i> | 42607230     | 42611324   | -             | RNA-binding protein-related                                                                                               |
| <i>Glyma.02g239100</i> | 42754798     | 42755899   | +             | Late embryogenesis abundant(lea) hydroxyproline-richglycoprotein-related                                                  |
| <i>Glyma.05g223500</i> | 40275557     | 40278080   | -             | 40s ribosomal proteins 15a-2-related                                                                                      |
| <i>Glyma.05g224500</i> | 40342583     | 40345336   | +             | Inositol oxygenase/myo-inositol oxygenase                                                                                 |
| <i>Glyma.05g225300</i> | 40408912     | 40410821   | +             | Extensin-like protein-related                                                                                             |
| <i>Glyma.05g225700</i> | 40432149     | 40439631   | +             | Profilin                                                                                                                  |
| <i>Glyma.07g078200</i> | 7144509      | 7148052    | -             | Armadillo/beta-catenin repeat-containing protein-related                                                                  |
| <i>Glyma.07g079900</i> | 7266622      | 7267156    | -             | Pthr22811/pthr22811:sf68-transmembrane emp24domain-containi                                                               |
| <i>Glyma.07g080500</i> | 7328383      | 7331416    | -             | Subtilisin-like serine protease-related                                                                                   |
| <i>Glyma.07g080600</i> | 7336252      | 7339584    | +             | Disease resistance family protein/lrr family protein                                                                      |

|                        |          |          |   |                                                          |
|------------------------|----------|----------|---|----------------------------------------------------------|
| <i>Glyma.07g081600</i> | 7479732  | 7487620  | + | Polygalacturonate4-alpha-galacturonosyl related          |
| <i>Glyma.11g095600</i> | 7249880  | 7254364  | - | Hexokinase-3-related                                     |
| <i>Glyma.11g095700</i> | 7263413  | 7265368  | - | Ubiquitin-conjugating enzyme E2                          |
| <i>Glyma.11g095800</i> | 7267458  | 7279596  | - | Nucleosome-remodeling factor subunit BPTF                |
| <i>Glyma.11g209100</i> | 30057154 | 30061089 | + | Mono dehydro ascorbate reductase, cytoplasm              |
| <i>Glyma.11g209200</i> | 30063770 | 30065301 | - | 60s acidic ribosomal protein P2                          |
| <i>Glyma.11g209400</i> | 30105649 | 30106749 | - | Germin-like protein subfamily 3 member 2                 |
| <i>Glyma.11g209600</i> | 30147295 | 30159083 | + | Protease u48caaxprenyl protease RCE1                     |
| <i>Glyma.08g082000</i> | 6188267  | 6192585  | - | 26s proteasome non-atpase regulatory subunit 8           |
| <i>Glyma.08g082100</i> | 6196059  | 6199325  | + | Programmedcelldeathprotein5                              |
| <i>Glyma.08g082200</i> | 6202794  | 6210874  | + | Potassium inward rectifier (kir)-like channel 3          |
| <i>Glyma.08g082500</i> | 6244916  | 6252372  | + | O-acetyl transferase CAS1p-like protein-related          |
| <i>Glyma.08g093400</i> | 7084753  | 7087202  | + | Hetero dimeric geranyl pyrophosphates                    |
| <i>Glyma.08g093900</i> | 7120394  | 7123346  | - | Xylo glucan endo trans glucosylase/hydrolase             |
| <i>Glyma.08g095400</i> | 7267235  | 7270875  | + | Isoamyl acetate-hydrolyzing esterase and related enzymes |
| <i>Glyma.09g051100</i> | 4454515  | 4461881  | + | Cellulose synthase a catalytic subunit7 [udp-fo          |
| <i>Glyma.09g051900</i> | 4508892  | 4509626  | - | Vqmotif (vq)                                             |
| <i>Glyma.09g052000</i> | 4519979  | 4527492  | - | E1-e2atpase (e1-e2_atpase)                               |
| <i>Glyma.09g073300</i> | 7723202  | 7726373  | + | Auxin-responsive protein-like protein-related            |
| <i>Glyma.01g218100</i> | 54819025 | 54824457 | + | Myosin heavy chain-related protein                       |
| <i>Glyma.01g218300</i> | 54838494 | 54842120 | + | De oxynucleotidyl transferase terminal-intera            |
| <i>Glyma.01g218400</i> | 54842601 | 54846844 | + | Kdellys-asp-glu-leu containing-related                   |
| <i>Glyma.01g220600</i> | 54974523 | 54976556 | + | Aqua porin PIP1-4-related                                |
| <i>Glyma.13g261700</i> | 36553556 | 36556696 | - | 11-oxo-beta-amyrin30-oxidase/cyp72a154                   |
| <i>Glyma.13g261900</i> | 36571819 | 36576038 | + | Protease family S26 mitochondrial                        |
| <i>Glyma.13g262000</i> | 36579260 | 36585256 | - | 11-oxo-beta-amyrin30-oxidase/cyp72a154                   |
| <i>Glyma.13g263600</i> | 36687392 | 36692071 | + | Mitogen-activated protein kinase18-related               |

---

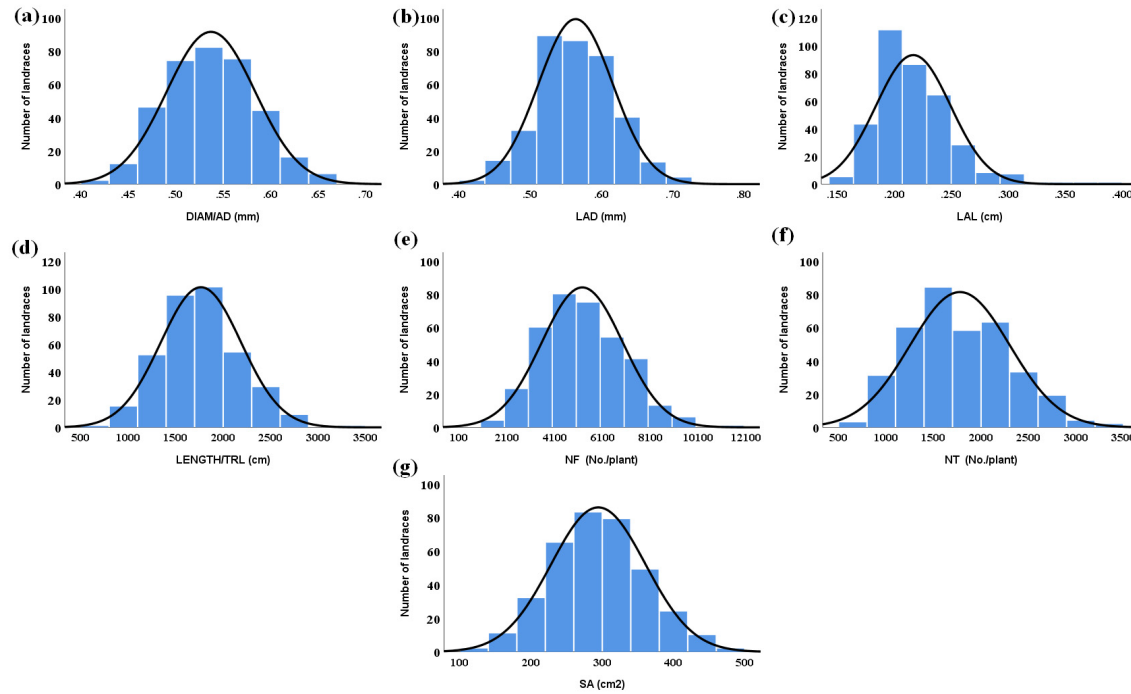

**Figure S1.** Frequency distribution of root traits among 357 soybean landraces. (a) Average diameter (DIAM), (b) Link average diameter (LAD), (c) Link average length (LAL), (d) Total root length (LENGTH), (e) Number of forks (NF), (f) Number of tips (NT), and (g) Surface area (SA).

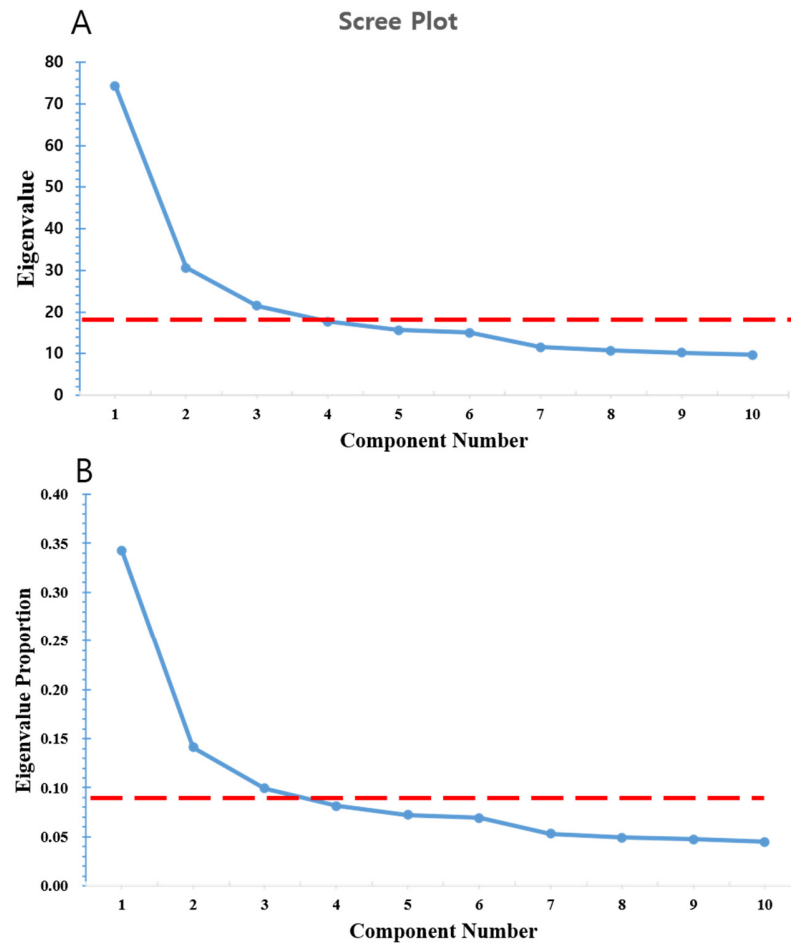

**Figure S2.** Representation of scree plot of principal component analysis. (A) The number of principal components (PCs) is on the x-axis and the associated eigenvalues are on the y-axis. (B) The number of principal components (PCs) is on the x-axis and the associated eigenvalue proportion is on the y-axis. The optimal number of principal components to explain the variation found in the genotype is found by visually determining the largest point of inflection or "elbow" of the non-linear red trend line.

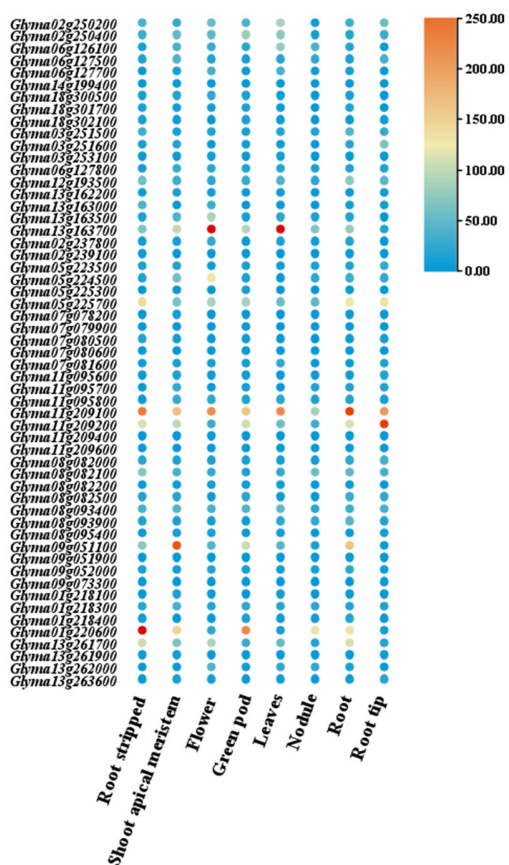

Supplemental Figure S3. Heatmap representing the expression of 55 candidate genes in various soybean plant tissue types. Data were accessed from [ePlant \(https://bar.utoronto.ca/eplant\\_soybean/\)](https://bar.utoronto.ca/eplant_soybean/) database. The level of expression showed differential patterns for selected genes.



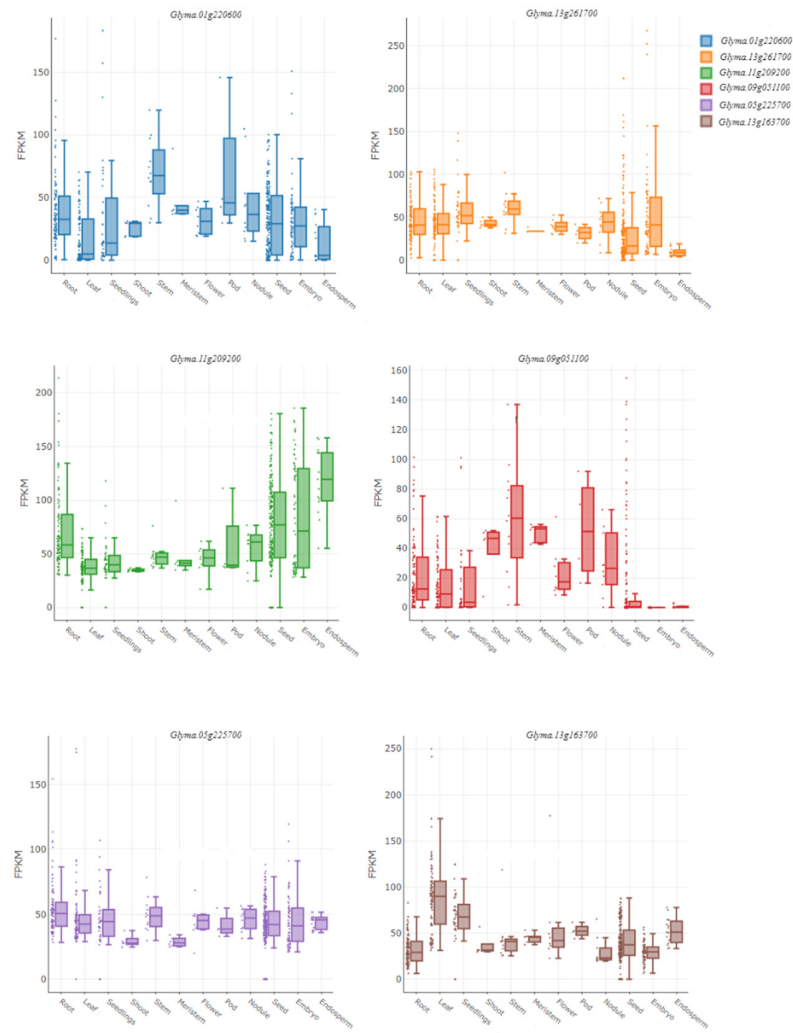

**Figure S4. Candidate genes expression levels across 12 different tissues.**

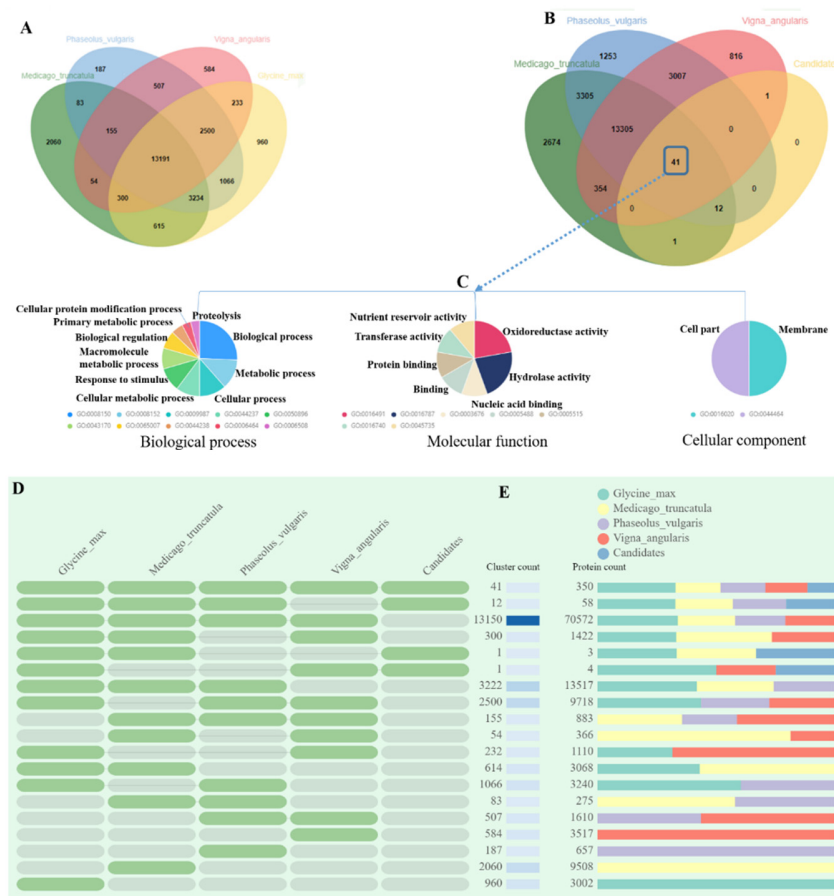

**Figure S5. Comparative genome analysis of 55 candidate genes expressed in root tissue (A). Venn diagram representing the core orthologs and specific genes cluster for *Glycine max*, *Medicago truncatula*, *Phaseolus vulgaris* and *Vigna angularis*. (B). Venn diagram representing the core orthologs and specific genes cluster for candidate genes of candidate genes, *Medicago truncatula*, *Phaseolus vulgaris* and *Vigna angularis*. (C). Gene ontology term enrichment analysis of core candidate genes (D). Shared gene clusters of orthologous groups categories. (E). Protein families count shared between *Glycine max*, *Medicago truncatula*, *Phaseolus vulgaris* and *Vigna angularis*, and candidate genes.**
